# Supplementary material for: Proteomic analysis of Escherichia coli detergent-resistant membranes (DRM)
Source: PLoS One. 2019 Oct 11;14(10):e0223794. doi: 10.1371/journal.pone.0223794 (PMC6788730; doi:10.1371/journal.pone.0223794)
Supplement: S3 Table — (XLSX) [file pone.0223794.s004.xlsx]

## Sheet: S3 Table
S3 Table. Relative abundance of inner membrane proteins in IM and DRM samples
Number	Gene	Protein name	UNIPROT access name	Subcellular location [CC]	IM peptide counts	DRM average peptide count	Average ratio	Average difference	Max coverage	Max count
1	acrB	Multidrug efflux pump subunit AcrB OS=Escherichia coli (strain K12) GN=acrB PE=1 SV=1	ACRB_ECOLI	Cell inner membrane {ECO:0000269|PubMed:15228545, ECO:0000269|PubMed:16079137}; Multi-pass membrane protein {ECO:0000269|PubMed:15228545, ECO:0000269|PubMed:16079137}.	68	191	2.80882	123	0.483	221
2	cyoA	Cytochrome bo(3) ubiquinol oxidase subunit 2 OS=Escherichia coli (strain K12) GN=cyoA PE=1 SV=1	CYOA_ECOLI	Cell inner membrane {ECO:0000269|PubMed:16079137, ECO:0000269|PubMed:6365921}; Multi-pass membrane protein {ECO:0000269|PubMed:16079137, ECO:0000269|PubMed:6365921}.	36	148	4.11111	112	0.676	200
3	mtlA	PTS system mannitol-specific EIICBA component OS=Escherichia coli (strain K12) GN=mtlA PE=1 SV=1	PTM3C_ECOLI	Cell inner membrane {ECO:0000255|PROSITE-ProRule:PRU00427, ECO:0000269|PubMed:15919996, ECO:0000305|PubMed:6309813}; Multi-pass membrane protein {ECO:0000255|PROSITE-ProRule:PRU00427, ECO:0000269|PubMed:15919996, ECO:0000305|PubMed:368051}.	70	161	2.3	91	0.672	196
4	acrA	Multidrug efflux pump subunit AcrA OS=Escherichia coli (strain K12) GN=acrA PE=1 SV=1	ACRA_ECOLI	Cell inner membrane {ECO:0000269|PubMed:15228545, ECO:0000269|PubMed:16079137}; Lipid-anchor {ECO:0000255|PROSITE-ProRule:PRU00303, ECO:0000269|PubMed:15228545, ECO:0000269|PubMed:16079137}. Note=An unlipidated version of this protein (directed to the periplasm by the OmpA signal sequence) functions normally.	132	220	1.66667	88	0.814	243
5	yebT	Uncharacterized protein YebT OS=Escherichia coli (strain K12) GN=yebT PE=3 SV=2	YEBT_ECOLI	Membrane {ECO:0000305}; Single-pass membrane protein {ECO:0000305}.	20	101	5.05	81	0.699	125
6	yajC	Sec translocon accessory complex subunit YajC OS=Escherichia coli (strain K12) GN=yajC PE=1 SV=1	YAJC_ECOLI	Cell inner membrane {ECO:0000269|PubMed:16079137, ECO:0000269|PubMed:27435098}; Single-pass membrane protein {ECO:0000269|PubMed:16079137}.	207	286	1.38164	79	0.873	300
7	pntB	NAD(P) transhydrogenase subunit beta OS=Escherichia coli (strain K12) GN=pntB PE=1 SV=1	PNTB_ECOLI	Cell inner membrane; Multi-pass membrane protein.	25	102	4.08	77	0.4	115
8	damX	Cell division protein DamX OS=Escherichia coli (strain K12) GN=damX PE=1 SV=2	DAMX_ECOLI	Cell inner membrane {ECO:0000305}; Single-pass membrane protein {ECO:0000255|HAMAP-Rule:MF_02021}. Note=Localizes at the septal ring (PubMed:19684127, PubMed:19880599, PubMed:23290046). Recruitment to the septal ring requires FtsZ (PubMed:19880599). {ECO:0000269|PubMed:19684127, ECO:0000269|PubMed:19880599, ECO:0000269|PubMed:23290046}.	65	138	2.12308	73	0.811	142
9	pntA	NAD(P) transhydrogenase subunit alpha OS=Escherichia coli (strain K12) GN=pntA PE=1 SV=2	PNTA_ECOLI	Cell inner membrane; Multi-pass membrane protein.	145	208	1.43448	63	0.7	244
10	yidC	Membrane protein insertase YidC OS=Escherichia coli (strain K12) GN=yidC PE=1 SV=2	YIDC_ECOLI	Cell inner membrane {ECO:0000269|PubMed:11821429, ECO:0000269|PubMed:16079137}; Multi-pass membrane protein {ECO:0000269|PubMed:11821429, ECO:0000269|PubMed:16079137}. Note=Predominantly localized at cell poles at all stages of cell growth.	56	115	2.05357	59	0.584	137
11	narH	Respiratory nitrate reductase 1 beta chain OS=Escherichia coli (strain K12) GN=narH PE=1 SV=3	NARH_ECOLI	Cell membrane; Peripheral membrane protein.	120	178	1.48333	58	0.836	193
12	mscK	Mechanosensitive channel MscK OS=Escherichia coli (strain K12) GN=mscK PE=1 SV=1	MSCK_ECOLI	Cell inner membrane {ECO:0000269|PubMed:11985727, ECO:0000269|PubMed:15919996}; Multi-pass membrane protein {ECO:0000269|PubMed:11985727, ECO:0000269|PubMed:15919996}.	50	108	2.16	58	0.426	116
13	mdtF	Multidrug resistance protein MdtF OS=Escherichia coli (strain K12) GN=mdtF PE=1 SV=1	MDTF_ECOLI	Cell inner membrane {ECO:0000269|PubMed:16079137}; Multi-pass membrane protein {ECO:0000269|PubMed:16079137}.	25	83	3.32	58	0.381	84
14	hflK	Modulator of FtsH protease HflK OS=Escherichia coli (strain K12) GN=hflK PE=1 SV=1	HFLK_ECOLI	Cell inner membrane {ECO:0000269|PubMed:8947034}; Single-pass type II membrane protein {ECO:0000269|PubMed:8947034}.	40	96	2.4	56	0.752	108
15	narG	Respiratory nitrate reductase 1 alpha chain OS=Escherichia coli (strain K12) GN=narG PE=1 SV=4	NARG_ECOLI	Cell membrane; Peripheral membrane protein.	313	365	1.16613	52	0.707	386
16	mlaD	Probable phospholipid ABC transporter-binding protein MlaD OS=Escherichia coli (strain K12) GN=mlaD PE=1 SV=1	MLAD_ECOLI	Cell inner membrane {ECO:0000305|PubMed:19383799}; Single-pass type II membrane protein {ECO:0000305|PubMed:19383799}; Periplasmic side {ECO:0000305|PubMed:19383799}.	70	119	1.7	49	0.951	133
17	hflC	Modulator of FtsH protease HflC OS=Escherichia coli (strain K12) GN=hflC PE=1 SV=1	HFLC_ECOLI	Cell inner membrane {ECO:0000269|PubMed:8947034}; Single-pass type II membrane protein {ECO:0000269|PubMed:8947034}.	80	122	1.525	42	0.629	132
18	ftsI	Peptidoglycan D,D-transpeptidase FtsI OS=Escherichia coli (strain K12) GN=ftsI PE=1 SV=1	FTSI_ECOLI	Cell inner membrane {ECO:0000255|HAMAP-Rule:MF_02080, ECO:0000269|PubMed:2677607, ECO:0000269|PubMed:9614966}; Single-pass membrane protein {ECO:0000255|HAMAP-Rule:MF_02080, ECO:0000269|PubMed:2677607, ECO:0000269|PubMed:9614966}; Periplasmic side {ECO:0000269|PubMed:2677607, ECO:0000269|PubMed:9614966}. Note=The bulk of the molecule, except for the N-terminal membrane anchor region, protrudes in…	33	75	2.27273	42	0.595	91
19	mrcB	Penicillin-binding protein 1B OS=Escherichia coli (strain K12) GN=mrcB PE=1 SV=2	PBPB_ECOLI	Cell inner membrane; Single-pass type II membrane protein.	32	68	2.125	36	0.451	75
20	cydA	Cytochrome bd-I ubiquinol oxidase subunit 1 OS=Escherichia coli (strain K12) GN=cydA PE=1 SV=1	CYDA_ECOLI	Cell inner membrane {ECO:0000269|PubMed:15013751, ECO:0000269|PubMed:16079137}; Multi-pass membrane protein {ECO:0000269|PubMed:15013751, ECO:0000269|PubMed:16079137}.	108	143	1.32407	35	0.45	145
21	hybC	Hydrogenase-2 large chain OS=Escherichia coli (strain K12) GN=hybC PE=1 SV=2	MBHM_ECOLI	Cell membrane; Peripheral membrane protein.	107	141	1.31776	34	0.806	141
22	yejM	Inner membrane protein YejM OS=Escherichia coli (strain K12) GN=yejM PE=1 SV=1	YEJM_ECOLI	Cell inner membrane; Multi-pass membrane protein.	24	58	2.41667	34	0.493	63
23	yfhM	Uncharacterized lipoprotein YfhM OS=Escherichia coli (strain K12) GN=yfhM PE=1 SV=1	YFHM_ECOLI	Cell membrane {ECO:0000255|PROSITE-ProRule:PRU00303}; Lipid-anchor {ECO:0000255|PROSITE-ProRule:PRU00303}.	35	68	1.94286	33	0.417	75
24	eptC	Phosphoethanolamine transferase EptC OS=Escherichia coli (strain K12) GN=eptC PE=1 SV=1	EPTC_ECOLI	Cell inner membrane {ECO:0000269|PubMed:16079137}; Multi-pass membrane protein {ECO:0000269|PubMed:16079137}.	25	58	2.32	33	0.458	59
25	yrfF	Putative membrane protein IgaA homolog OS=Escherichia coli (strain K12) GN=yrfF PE=1 SV=1	IGAA_ECOLI	Cell inner membrane; Multi-pass membrane protein.	9	42	4.66667	33	0.338	44
26	lnt	Apolipoprotein N-acyltransferase OS=Escherichia coli (strain K12) GN=lnt PE=1 SV=1 1	LNT_ECOLI	Cell inner membrane {ECO:0000269|PubMed:15919996, ECO:0000269|PubMed:2032623}; Multi-pass membrane protein {ECO:0000269|PubMed:15919996, ECO:0000269|PubMed:2032623}.	9	41	4.55556	32	0.467	45
27	pqiB	Paraquat-inducible protein B OS=Escherichia coli (strain K12) GN=pqiB PE=1 SV=2	PQIB_ECOLI	Cell membrane {ECO:0000305}; Single-pass membrane protein {ECO:0000305}.	21	52	2.47619	31	0.628	56
28	kgtP	Alpha-ketoglutarate permease OS=Escherichia coli (strain K12) GN=kgtP PE=1 SV=1	KGTP_ECOLI	Cell inner membrane {ECO:0000269|PubMed:15919996}; Multi-pass membrane protein {ECO:0000269|PubMed:15919996}.	9	40	4.44444	31	0.308	42
29	ptsG	PTS system glucose-specific EIICB component OS=Escherichia coli (strain K12) GN=ptsG PE=1 SV=1	PTGCB_ECOLI	Cell inner membrane {ECO:0000255|PROSITE-ProRule:PRU00426, ECO:0000305|PubMed:3129430}; Multi-pass membrane protein {ECO:0000255|PROSITE-ProRule:PRU00426}.	46	75	1.63043	29	0.547	93
30	msbA	Lipid A export ATP-binding/permease protein MsbA OS=Escherichia coli (strain K12) GN=msbA PE=1 SV=1	MSBA_ECOLI	Cell inner membrane {ECO:0000255|HAMAP-Rule:MF_01703, ECO:0000269|PubMed:12119303, ECO:0000269|PubMed:15919996, ECO:0000269|PubMed:8809774}; Multi-pass membrane protein {ECO:0000255|HAMAP-Rule:MF_01703, ECO:0000269|PubMed:8809774}.	38	67	1.76316	29	0.45	73
31	yecC	L-cystine transport system ATP-binding protein YecC OS=Escherichia coli (strain K12) GN=yecC PE=3 SV=2	YECC_ECOLI	Cell inner membrane {ECO:0000305}; Peripheral membrane protein {ECO:0000305}.	4	33	8.25	29	0.604	33
32	borD	Prophage lipoprotein Bor homolog OS=Escherichia coli (strain K12) GN=borD PE=3 SV=1	BORD_ECOLI	Cell membrane {ECO:0000305}; Lipid-anchor {ECO:0000305}.	4	32	8	28	0.588	41
33	mrdA	Peptidoglycan D,D-transpeptidase MrdA OS=Escherichia coli (strain K12) GN=mrdA PE=1 SV=1	MRDA_ECOLI	Cell inner membrane {ECO:0000255|HAMAP-Rule:MF_02081, ECO:0000269|PubMed:1103132, ECO:0000269|PubMed:3009484}; Single-pass membrane protein {ECO:0000255|HAMAP-Rule:MF_02081}. Note=Localizes preferentially in the lateral wall and at mid-cell in comparison with the old cell pole. Localization at mid-cell is dependent on active FtsI. {ECO:0000269|PubMed:12519203}.	17	43	2.52941	26	0.428	46
34	corA	Magnesium transport protein CorA OS=Escherichia coli (strain K12) GN=corA PE=1 SV=1	CORA_ECOLI	Cell inner membrane {ECO:0000305|PubMed:780341}; Multi-pass membrane protein {ECO:0000250|UniProtKB:Q9WZ31}.	37	61	1.64865	24	0.747	73
35	narK	Nitrate/nitrite transporter NarK OS=Escherichia coli (strain K12) GN=narK PE=1 SV=2	NARK_ECOLI	Cell inner membrane {ECO:0000269|PubMed:15919996}; Multi-pass membrane protein {ECO:0000269|PubMed:15919996}.	11	35	3.18182	24	0.33	37
36	mdtE	Multidrug resistance protein MdtE OS=Escherichia coli (strain K12) GN=mdtE PE=1 SV=1	MDTE_ECOLI	Cell inner membrane {ECO:0000305}; Lipid-anchor {ECO:0000255|PROSITE-ProRule:PRU00303}.	41	64	1.56098	23	0.764	72
37	yhcB	Inner membrane protein YhcB OS=Escherichia coli (strain K12) GN=yhcB PE=1 SV=2	YHCB_ECOLI	Cell inner membrane {ECO:0000269|PubMed:16079137, ECO:0000269|PubMed:21210718}; Single-pass membrane protein {ECO:0000269|PubMed:16079137, ECO:0000269|PubMed:21210718}.	35	58	1.65714	23	0.689	59
38	degS	Serine endoprotease DegS OS=Escherichia coli (strain K12) GN=degS PE=1 SV=1	DEGS_ECOLI	Cell inner membrane {ECO:0000305|PubMed:11442831}; Single-pass membrane protein {ECO:0000305|PubMed:11442831}. Note=It is unclear how this protein is anchored to the inner membrane, programs predict a signal sequence, but replacing the N-terminal 26 residues with a known signal sequence gives a protein unable to fully complement a disruption mutant. {ECO:0000269|PubMed:11442831}.	23	46	2	23	0.628	47
39	cyoB	Cytochrome bo(3) ubiquinol oxidase subunit 1 OS=Escherichia coli (strain K12) GN=cyoB PE=1 SV=1	CYOB_ECOLI	Cell inner membrane {ECO:0000269|PubMed:6365921}; Multi-pass membrane protein {ECO:0000269|PubMed:6365921}.	23	45	1.95652	22	0.155	58
40	hybO	Hydrogenase-2 small chain OS=Escherichia coli (strain K12) GN=hybO PE=1 SV=1	MBHT_ECOLI	Cell membrane; Peripheral membrane protein; Periplasmic side. Periplasm.	44	65	1.47727	21	0.763	74
41	ftsN	Cell division protein FtsN OS=Escherichia coli (strain K12) GN=ftsN PE=1 SV=3	FTSN_ECOLI	Cell inner membrane {ECO:0000269|PubMed:8631709}; Single-pass type II membrane protein {ECO:0000269|PubMed:8631709}. Note=Localizes to the septum (PubMed:9282742, PubMed:19684127, PubMed:24750258). Localizes to the midcell via interaction with the early cell division protein FtsA and via the periplasmic SPOR domain (PubMed:9282742, PubMed:19684127, PubMed:24750258). FtsA-dependent localization pr…	29	50	1.72414	21	0.734	52
42	wzzE	ECA polysaccharide chain length modulation protein OS=Escherichia coli (strain K12) GN=wzzE PE=1 SV=2	WZZE_ECOLI	Cell inner membrane {ECO:0000255|HAMAP-Rule:MF_02025, ECO:0000305}; Multi-pass membrane protein {ECO:0000255|HAMAP-Rule:MF_02025}.	17	38	2.23529	21	0.658	39
43	srlE	PTS system glucitol/sorbitol-specific EIIB component OS=Escherichia coli (strain K12) GN=srlE PE=1 SV=1	PTHB_ECOLI	Cell inner membrane {ECO:0000305|PubMed:3553176}; Multi-pass membrane protein {ECO:0000255, ECO:0000305|PubMed:3553176}.	4	23	5.75	19	0.423	29
44	nagE	PTS system N-acetylglucosamine-specific EIICBA component OS=Escherichia coli (strain K12) GN=nagE PE=1 SV=1	PTW3C_ECOLI	Cell inner membrane {ECO:0000255|PROSITE-ProRule:PRU00426, ECO:0000269|PubMed:15919996}; Multi-pass membrane protein {ECO:0000255|PROSITE-ProRule:PRU00426, ECO:0000269|PubMed:15919996}.	58	76	1.31034	18	0.502	88
45	narY	Respiratory nitrate reductase 2 beta chain OS=Escherichia coli (strain K12) GN=narY PE=1 SV=2	NARY_ECOLI	Cell membrane; Peripheral membrane protein.	6	24	4	18	0.23	24
46	dsbD	Thiol:disulfide interchange protein DsbD OS=Escherichia coli (strain K12) GN=dsbD PE=1 SV=4	DSBD_ECOLI	Cell inner membrane; Multi-pass membrane protein.	8	25	3.125	17	0.32	26
47	waaA	3-deoxy-D-manno-octulosonic acid transferase OS=Escherichia coli (strain K12) GN=waaA PE=1 SV=1	KDTA_ECOLI	Cell inner membrane {ECO:0000305|PubMed:1577828}; Single-pass membrane protein {ECO:0000305|PubMed:1577828}; Cytoplasmic side {ECO:0000305|PubMed:1577828}.	17	33	1.94118	16	0.548	34
48	gadC	Probable glutamate/gamma-aminobutyrate antiporter OS=Escherichia coli (strain K12) GN=gadC PE=1 SV=1	GADC_ECOLI	Cell inner membrane; Multi-pass membrane protein.	11	27	2.45455	16	0.182	28
49	lptG	Lipopolysaccharide export system permease protein LptG OS=Escherichia coli (strain K12) GN=lptG PE=1 SV=1	LPTG_ECOLI	Cell inner membrane; Multi-pass membrane protein.	5	21	4.2	16	0.481	25
50	ybjP	Uncharacterized lipoprotein YbjP OS=Escherichia coli (strain K12) GN=ybjP PE=1 SV=1	YBJP_ECOLI	Cell membrane {ECO:0000305}; Lipid-anchor {ECO:0000305}.	4	20	5	16	0.655	22
51	cadC	Transcriptional activator CadC OS=Escherichia coli (strain K12) GN=cadC PE=1 SV=1	CADC_ECOLI	Cell membrane {ECO:0000305}; Single-pass membrane protein {ECO:0000305}.	2	18	9	16	0.496	23
52	metQ	D-methionine-binding lipoprotein MetQ OS=Escherichia coli (strain K12) GN=metQ PE=1 SV=2	METQ_ECOLI	Cell membrane {ECO:0000305}; Lipid-anchor {ECO:0000305}.	125	140	1.12	15	0.841	144
53	ftsQ	Cell division protein FtsQ OS=Escherichia coli (strain K12) GN=ftsQ PE=1 SV=1	FTSQ_ECOLI	Cell inner membrane {ECO:0000255|HAMAP-Rule:MF_00911, ECO:0000269|PubMed:11415986, ECO:0000269|PubMed:11703663, ECO:0000269|PubMed:11948172, ECO:0000269|PubMed:15165235, ECO:0000269|PubMed:17693520, ECO:0000269|PubMed:2007547, ECO:0000269|PubMed:9829918, ECO:0000269|PubMed:9882666}; Single-pass type II membrane protein {ECO:0000255|HAMAP-Rule:MF_00911, ECO:0000269|PubMed:11415986, ECO:0000269|Pub…	17	32	1.88235	15	0.616	35
54	yajG	Uncharacterized lipoprotein YajG OS=Escherichia coli (strain K12) GN=yajG PE=3 SV=1	YAJG_ECOLI	Cell membrane {ECO:0000305}; Lipid-anchor {ECO:0000305}.	4	19	4.75	15	0.51	23
55	glpT	Glycerol-3-phosphate transporter OS=Escherichia coli (strain K12) GN=glpT PE=1 SV=1	GLPT_ECOLI	Cell inner membrane; Multi-pass membrane protein.	35	49	1.4	14	0.292	50
56	secG	Protein-export membrane protein SecG OS=Escherichia coli (strain K12) GN=secG PE=1 SV=1	SECG_ECOLI	Cell inner membrane; Multi-pass membrane protein.	17	31	1.82353	14	0.555	31
57	qmcA	Protein QmcA OS=Escherichia coli (strain K12) GN=qmcA PE=1 SV=1	QMCA_ECOLI	Cell inner membrane {ECO:0000269|PubMed:16573693}; Single-pass type I membrane protein {ECO:0000269|PubMed:16573693}.	8	22	2.75	14	0.495	23
58	nlpA	Lipoprotein 28 OS=Escherichia coli (strain K12) GN=nlpA PE=1 SV=1	NLPA_ECOLI	Cell inner membrane; Lipid-anchor.	12	25	2.08333	13	0.562	26
59	lptC	Lipopolysaccharide export system protein LptC OS=Escherichia coli (strain K12) GN=lptC PE=1 SV=1	LPTC_ECOLI	Cell inner membrane {ECO:0000255|HAMAP-Rule:MF_01915, ECO:0000269|PubMed:18424520, ECO:0000269|PubMed:20720015}; Single-pass membrane protein {ECO:0000255|HAMAP-Rule:MF_01915, ECO:0000269|PubMed:18424520, ECO:0000269|PubMed:20720015}.	10	23	2.3	13	0.545	25
60	rsxG	Electron transport complex subunit RsxG OS=Escherichia coli (strain K12) GN=rsxG PE=1 SV=1	RSXG_ECOLI	Cell inner membrane {ECO:0000255|HAMAP-Rule:MF_00479}.	4	17	4.25	13	0.524	23
61	secY	Protein translocase subunit SecY OS=Escherichia coli (strain K12) GN=secY PE=1 SV=1	SECY_ECOLI	Cell inner membrane; Multi-pass membrane protein.	19	31	1.63158	12	0.458	31
62	macA	Macrolide export protein MacA OS=Escherichia coli (strain K12) GN=macA PE=1 SV=2	MACA_ECOLI	Cell inner membrane {ECO:0000269|PubMed:11544226, ECO:0000269|PubMed:17214741}; Single-pass membrane protein {ECO:0000269|PubMed:11544226, ECO:0000269|PubMed:17214741}; Periplasmic side {ECO:0000269|PubMed:11544226, ECO:0000269|PubMed:17214741}.	10	22	2.2	12	0.415	24
63	cydB	Cytochrome bd-I ubiquinol oxidase subunit 2 OS=Escherichia coli (strain K12) GN=cydB PE=1 SV=1	CYDB_ECOLI	Cell inner membrane {ECO:0000269|PubMed:15013751, ECO:0000269|PubMed:16079137}; Multi-pass membrane protein {ECO:0000269|PubMed:15013751, ECO:0000269|PubMed:16079137}. Note=The displayed topology is based on (PubMed:15013751) not the large scale studies (PubMed:15919996). {ECO:0000269|PubMed:15013751, ECO:0000269|PubMed:15919996}.	9	21	2.33333	12	0.274	21
64	ybaL	Putative cation/proton antiporter YbaL OS=Escherichia coli (strain K12) GN=ybaL PE=1 SV=2	YBAL_ECOLI	Cell inner membrane {ECO:0000269|PubMed:15919996}; Multi-pass membrane protein {ECO:0000305|PubMed:15919996}.	7	19	2.71429	12	0.247	19
65	acrD	Probable aminoglycoside efflux pump OS=Escherichia coli (strain K12) GN=acrD PE=3 SV=3	ACRD_ECOLI	Cell inner membrane {ECO:0000269|PubMed:15919996}; Multi-pass membrane protein {ECO:0000269|PubMed:15919996}.	4	16	4	12	0.123	17
66	ccmA	Cytochrome c biogenesis ATP-binding export protein CcmA OS=Escherichia coli (strain K12) GN=ccmA PE=1 SV=2	CCMA_ECOLI	Cell inner membrane {ECO:0000255|HAMAP-Rule:MF_01707}; Peripheral membrane protein {ECO:0000255|HAMAP-Rule:MF_01707}.	3	15	5	12	0.667	19
67	wzzB	Chain length determinant protein OS=Escherichia coli (strain K12) GN=wzzB PE=1 SV=2	WZZB_ECOLI	Cell inner membrane {ECO:0000269|PubMed:15919996, ECO:0000269|PubMed:16079137}; Multi-pass membrane protein {ECO:0000269|PubMed:15919996, ECO:0000269|PubMed:16079137}.	55	66	1.2	11	0.77	69
68	tolQ	Protein TolQ OS=Escherichia coli (strain K12) GN=tolQ PE=1 SV=1	TOLQ_ECOLI	Cell inner membrane; Multi-pass membrane protein.	29	40	1.37931	11	0.443	42
69	proP	Proline/betaine transporter OS=Escherichia coli (strain K12) GN=proP PE=1 SV=1	PROP_ECOLI	Cell inner membrane {ECO:0000269|PubMed:10026245, ECO:0000269|PubMed:15919996}; Multi-pass membrane protein {ECO:0000255}.	24	35	1.45833	11	0.178	35
70	sdaC	Serine transporter OS=Escherichia coli (strain K12) GN=sdaC PE=1 SV=1	SDAC_ECOLI	Cell inner membrane; Multi-pass membrane protein.	14	25	1.78571	11	0.329	30
71	pitA	Low-affinity inorganic phosphate transporter 1 OS=Escherichia coli (strain K12) GN=pitA PE=1 SV=1	PITA_ECOLI	Cell inner membrane; Multi-pass membrane protein.	13	24	1.84615	11	0.277	24
72	djlA	Co-chaperone protein DjlA OS=Escherichia coli (strain K12) GN=djlA PE=1 SV=1	DJLA_ECOLI	Cell inner membrane {ECO:0000255|HAMAP-Rule:MF_01153, ECO:0000269|PubMed:11106641, ECO:0000269|PubMed:8809778, ECO:0000269|PubMed:9364917}; Single-pass type III membrane protein {ECO:0000255|HAMAP-Rule:MF_01153, ECO:0000269|PubMed:11106641, ECO:0000269|PubMed:8809778, ECO:0000269|PubMed:9364917}.	12	23	1.91667	11	0.472	28
73	tolR	Protein TolR OS=Escherichia coli (strain K12) GN=tolR PE=1 SV=1	TOLR_ECOLI	Cell inner membrane; Single-pass type II membrane protein.	8	19	2.375	11	0.317	22
74	cstA	Carbon starvation protein A OS=Escherichia coli (strain K12) GN=cstA PE=1 SV=3	CSTA_ECOLI	Cell inner membrane; Multi-pass membrane protein.	3	14	4.66667	11	0.157	16
75	cyoC	Cytochrome bo(3) ubiquinol oxidase subunit 3 OS=Escherichia coli (strain K12) GN=cyoC PE=1 SV=1	CYOC_ECOLI	Cell inner membrane; Multi-pass membrane protein.	2	13	6.5	11	0.206	15
76	rodZ	Cytoskeleton protein RodZ OS=Escherichia coli (strain K12) GN=rodZ PE=1 SV=2	RODZ_ECOLI	Cell inner membrane {ECO:0000269|PubMed:19008860}; Single-pass type II membrane protein {ECO:0000269|PubMed:19008860}. Note=Forms helical filaments along the long axis of the cell.	22	32	1.45455	10	0.392	34
77	ynaI	Low conductance mechanosensitive channel YnaI OS=Escherichia coli (strain K12) GN=ynaI PE=1 SV=1	YNAI_ECOLI	Cell inner membrane {ECO:0000269|PubMed:15919996, ECO:0000269|PubMed:22874652}; Multi-pass membrane protein {ECO:0000269|PubMed:15919996, ECO:0000269|PubMed:22874652}.	11	21	1.90909	10	0.402	22
78	ytjB	Probable inner membrane protein Smp OS=Escherichia coli (strain K12) GN=ytjB PE=2 SV=1	SMP_ECOLI	Cell inner membrane {ECO:0000305|PubMed:2684780}; Single-pass membrane protein {ECO:0000255}.	6	16	2.66667	10	0.463	18
79	cusS	Sensor kinase CusS OS=Escherichia coli (strain K12) GN=cusS PE=1 SV=1	CUSS_ECOLI	Cell inner membrane; Multi-pass membrane protein.	5	15	3	10	0.252	15
80	ybjL	Putative transport protein YbjL OS=Escherichia coli (strain K12) GN=ybjL PE=3 SV=1	YBJL_ECOLI	Cell membrane {ECO:0000255|HAMAP-Rule:MF_01015}; Multi-pass membrane protein {ECO:0000255|HAMAP-Rule:MF_01015}.	4	14	3.5	10	0.296	19
81	cydC	ATP-binding/permease protein CydC OS=Escherichia coli (strain K12) GN=cydC PE=3 SV=2	CYDC_ECOLI	Cell inner membrane {ECO:0000269|PubMed:15919996}; Multi-pass membrane protein {ECO:0000255|PROSITE-ProRule:PRU00441, ECO:0000269|PubMed:15919996}.	34	43	1.26471	9	0.386	43
82	dcuA	Anaerobic C4-dicarboxylate transporter DcuA OS=Escherichia coli (strain K12) GN=dcuA PE=1 SV=1	DCUA_ECOLI	Cell inner membrane; Multi-pass membrane protein.	14	23	1.64286	9	0.247	30
83	napH	Ferredoxin-type protein NapH OS=Escherichia coli (strain K12) GN=napH PE=4 SV=1	NAPH_ECOLI	Cell inner membrane {ECO:0000269|PubMed:15919996}; Multi-pass membrane protein {ECO:0000269|PubMed:15919996}.	1	10	10	9	0.317	11
84	kefG	Glutathione-regulated potassium-efflux system ancillary protein KefG OS=Escherichia coli (strain K12) GN=kefG PE=3 SV=1	KEFG_ECOLI	Cell inner membrane {ECO:0000255|HAMAP-Rule:MF_01415}; Peripheral membrane protein {ECO:0000255|HAMAP-Rule:MF_01415}; Cytoplasmic side {ECO:0000255|HAMAP-Rule:MF_01415}.		9	-	9	0.538	12
85	ftsL	Cell division protein FtsL OS=Escherichia coli (strain K12) GN=ftsL PE=1 SV=1	FTSL_ECOLI	Cell inner membrane {ECO:0000255|HAMAP-Rule:MF_00910, ECO:0000269|PubMed:10027987, ECO:0000269|PubMed:11703663, ECO:0000269|PubMed:11948172, ECO:0000269|PubMed:1332942, ECO:0000269|PubMed:15165235}; Single-pass type II membrane protein {ECO:0000255|HAMAP-Rule:MF_00910, ECO:0000269|PubMed:10027987, ECO:0000269|PubMed:11703663, ECO:0000269|PubMed:11948172, ECO:0000269|PubMed:1332942, ECO:0000269|Pu…		9	-	9	0.405	10
86	cydD	ATP-binding/permease protein CydD OS=Escherichia coli (strain K12) GN=cydD PE=1 SV=3	CYDD_ECOLI	Cell inner membrane {ECO:0000269|PubMed:15919996}; Multi-pass membrane protein {ECO:0000255|PROSITE-ProRule:PRU00441, ECO:0000269|PubMed:15919996}.	35	43	1.22857	8	0.498	47
87	nhaB	Na(+)/H(+) antiporter NhaB OS=Escherichia coli (strain K12) GN=nhaB PE=1 SV=1	NHAB_ECOLI	Cell inner membrane {ECO:0000269|PubMed:15919996}; Multi-pass membrane protein {ECO:0000269|PubMed:15919996}.	11	19	1.72727	8	0.162	21
88	cysA	Sulfate/thiosulfate import ATP-binding protein CysA OS=Escherichia coli (strain K12) GN=cysA PE=3 SV=2	CYSA_ECOLI	Cell inner membrane {ECO:0000255|HAMAP-Rule:MF_01701}; Peripheral membrane protein {ECO:0000255|HAMAP-Rule:MF_01701}.	10	18	1.8	8	0.422	27
89	osmE	Osmotically-inducible putative lipoprotein OsmE OS=Escherichia coli (strain K12) GN=osmE PE=2 SV=1	OSME_ECOLI	Cell inner membrane {ECO:0000305}; Lipid-anchor {ECO:0000305}.	5	13	2.6	8	0.696	13
90	ccmF	Cytochrome c-type biogenesis protein CcmF OS=Escherichia coli (strain K12) GN=ccmF PE=1 SV=1	CCMF_ECOLI	Cell inner membrane; Multi-pass membrane protein.		8	-	8	0.128	9
91	secD	Protein translocase subunit SecD OS=Escherichia coli (strain K12) GN=secD PE=1 SV=1	SECD_ECOLI	Cell inner membrane {ECO:0000269|PubMed:15919996, ECO:0000269|PubMed:16079137}; Multi-pass membrane protein {ECO:0000269|PubMed:15919996, ECO:0000269|PubMed:16079137}.	63	70	1.11111	7	0.574	76
92	mscM	Miniconductance mechanosensitive channel MscM OS=Escherichia coli (strain K12) GN=mscM PE=1 SV=3	MSCM_ECOLI	Cell inner membrane {ECO:0000269|PubMed:22874652}; Multi-pass membrane protein {ECO:0000269|PubMed:22874652}.	45	52	1.15556	7	0.336	55
93	fruA	PTS system fructose-specific EIIB'BC component OS=Escherichia coli (strain K12) GN=fruA PE=1 SV=1	PTFBC_ECOLI	Cell inner membrane {ECO:0000255|PROSITE-ProRule:PRU00427, ECO:0000269|PubMed:15919996, ECO:0000305|PubMed:3076173}; Multi-pass membrane protein {ECO:0000255|PROSITE-ProRule:PRU00427, ECO:0000269|PubMed:15919996, ECO:0000305|PubMed:3076173, ECO:0000305|PubMed:8626640}.	17	24	1.41176	7	0.403	32
94	ampE	Protein AmpE OS=Escherichia coli (strain K12) GN=ampE PE=1 SV=1	AMPE_ECOLI	Cell inner membrane; Multi-pass membrane protein.	9	16	1.77778	7	0.384	16
95	secF	Protein translocase subunit SecF OS=Escherichia coli (strain K12) GN=secF PE=1 SV=1	SECF_ECOLI	Cell inner membrane; Multi-pass membrane protein.	7	14	2	7	0.316	15
96	dauA	C4-dicarboxylic acid transporter DauA OS=Escherichia coli (strain K12) GN=dauA PE=1 SV=2	DAUA_ECOLI	Cell inner membrane {ECO:0000269|PubMed:15919996, ECO:0000269|PubMed:23278959}; Multi-pass membrane protein {ECO:0000269|PubMed:15919996, ECO:0000269|PubMed:23278959}.	7	14	2	7	0.166	14
97	frdC	Fumarate reductase subunit C OS=Escherichia coli (strain K12) GN=frdC PE=1 SV=1	FRDC_ECOLI	Cell inner membrane; Multi-pass membrane protein.	6	13	2.16667	7	0.519	14
98	yedE	UPF0394 inner membrane protein YedE OS=Escherichia coli (strain K12) GN=yedE PE=1 SV=1	YEDE_ECOLI	Cell inner membrane; Multi-pass membrane protein.	5	12	2.4	7	0.299	12
99	dcuS	Sensor histidine kinase DcuS OS=Escherichia coli (strain K12) GN=dcuS PE=1 SV=1	DCUS_ECOLI	Cell inner membrane; Multi-pass membrane protein.	1	8	8	7	0.182	9
100	fhuC	Iron(3+)-hydroxamate import ATP-binding protein FhuC OS=Escherichia coli (strain K12) GN=fhuC PE=1 SV=3	FHUC_ECOLI	Cell inner membrane {ECO:0000269|PubMed:1551849}; Peripheral membrane protein {ECO:0000269|PubMed:1551849}. Note=FhuB mediates the association of FhuC with the cytoplasmic membrane. {ECO:0000269|PubMed:1551849}.		7	-	7	0.358	10
101	yjiN	Uncharacterized protein YjiN OS=Escherichia coli (strain K12) GN=yjiN PE=4 SV=1	YJIN_ECOLI	Cell membrane {ECO:0000305}; Multi-pass membrane protein {ECO:0000305}.		7	-	7	0.164	8
102	sohB	Probable protease SohB OS=Escherichia coli (strain K12) GN=sohB PE=1 SV=1	SOHB_ECOLI	Cell inner membrane; Single-pass membrane protein.	22	28	1.27273	6	0.467	33
103	ppk	Polyphosphate kinase OS=Escherichia coli (strain K12) GN=ppk PE=1 SV=2 1	PPK_ECOLI	Cell membrane {ECO:0000269|PubMed:1331061}; Peripheral membrane protein {ECO:0000269|PubMed:1331061}. Note=Associated with the outer membrane in overproducing cells. {ECO:0000269|PubMed:1331061}.	14	20	1.42857	6	0.301	22
104	yidE	Putative transport protein YidE OS=Escherichia coli (strain K12) GN=yidE PE=3 SV=1	YIDE_ECOLI	Cell membrane {ECO:0000255|HAMAP-Rule:MF_01016}; Multi-pass membrane protein {ECO:0000255|HAMAP-Rule:MF_01016}.	7	13	1.85714	6	0.237	17
105	ftsB	Cell division protein FtsB OS=Escherichia coli (strain K12) GN=ftsB PE=1 SV=1	FTSB_ECOLI	Cell inner membrane {ECO:0000255|HAMAP-Rule:MF_00599, ECO:0000269|PubMed:11972052, ECO:0000269|PubMed:15165235}; Single-pass type II membrane protein {ECO:0000255|HAMAP-Rule:MF_00599, ECO:0000269|PubMed:11972052, ECO:0000269|PubMed:15165235}. Note=Localizes to the division septum. Localization requires FtsQ and FtsL, but not FtsW and FtsI. Localization of FtsB and FtsL is codependent.	3	9	3	6	0.359	11
106	glpG	Rhomboid protease GlpG OS=Escherichia coli (strain K12) GN=glpG PE=1 SV=5	GLPG_ECOLI	Cell inner membrane {ECO:0000269|PubMed:16216077}; Multi-pass membrane protein {ECO:0000269|PubMed:16216077}.	3	9	3	6	0.322	10
107	yeaY	Uncharacterized lipoprotein YeaY OS=Escherichia coli (strain K12) GN=yeaY PE=3 SV=1	YEAY_ECOLI	Cell membrane {ECO:0000255|PROSITE-ProRule:PRU00303}; Lipid-anchor {ECO:0000255|PROSITE-ProRule:PRU00303}.	2	8	4	6	0.596	10
108	cybB	Cytochrome b561 OS=Escherichia coli (strain K12) GN=cybB PE=1 SV=1	C561_ECOLI	Cell inner membrane; Multi-pass membrane protein.	2	8	4	6	0.409	8
109	yifL	Uncharacterized lipoprotein YifL OS=Escherichia coli (strain K12) GN=yifL PE=3 SV=1	YIFL_ECOLI	Cell membrane {ECO:0000255|PROSITE-ProRule:PRU00303}; Lipid-anchor {ECO:0000255|PROSITE-ProRule:PRU00303}.		6	-	6	0.507	8
110	apbE	FAD:protein FMN transferase OS=Escherichia coli (strain K12) GN=apbE PE=1 SV=1	APBE_ECOLI	Cell inner membrane {ECO:0000250|UniProtKB:P41780, ECO:0000255|PROSITE-ProRule:PRU00303}; Lipid-anchor {ECO:0000250|UniProtKB:P41780, ECO:0000255|PROSITE-ProRule:PRU00303}; Periplasmic side {ECO:0000250|UniProtKB:P41780}.		6	-	6	0.225	8
111	motB	Motility protein B OS=Escherichia coli (strain K12) GN=motB PE=1 SV=1	MOTB_ECOLI	Cell inner membrane {ECO:0000269|PubMed:2447650}; Single-pass type II membrane protein {ECO:0000269|PubMed:2447650}. Note=The OmpA-like domain probably functions to anchor the complex to the cell wall.	2	8	4	6	0.24	8
112	emrA	Multidrug export protein EmrA OS=Escherichia coli (strain K12) GN=emrA PE=1 SV=2	EMRA_ECOLI	Cell inner membrane {ECO:0000269|PubMed:12482849, ECO:0000269|PubMed:1409590}; Single-pass membrane protein {ECO:0000269|PubMed:12482849, ECO:0000269|PubMed:1409590}; Periplasmic side {ECO:0000269|PubMed:12482849, ECO:0000269|PubMed:1409590}.	14	19	1.35714	5	0.323	19
113	yjiY	Inner membrane protein YjiY OS=Escherichia coli (strain K12) GN=yjiY PE=1 SV=2	YJIY_ECOLI	Cell inner membrane {ECO:0000269|PubMed:15919996, ECO:0000269|PubMed:22685278}; Multi-pass membrane protein {ECO:0000269|PubMed:15919996, ECO:0000269|PubMed:22685278}.	7	12	1.71429	5	0.215	12
114	kup	Low affinity potassium transport system protein kup OS=Escherichia coli (strain K12) GN=kup PE=3 SV=1 1	KUP_ECOLI	Cell inner membrane {ECO:0000269|PubMed:15919996}; Multi-pass membrane protein {ECO:0000269|PubMed:15919996}.	5	10	2	5	0.113	10
115	dtpA	Dipeptide and tripeptide permease A OS=Escherichia coli (strain K12) GN=dtpA PE=1 SV=1	DTPA_ECOLI	Cell inner membrane {ECO:0000305}; Multi-pass membrane protein {ECO:0000305}.	4	9	2.25	5	0.19	11
116	cvrA	K(+)/H(+) antiporter NhaP2 OS=Escherichia coli (strain K12) GN=cvrA PE=1 SV=2	NHAP2_ECOLI	Cell inner membrane {ECO:0000255|HAMAP-Rule:MF_01075}; Multi-pass membrane protein {ECO:0000255|HAMAP-Rule:MF_01075}.	3	8	2.66667	5	0.166	9
117	yccF	Inner membrane protein YccF OS=Escherichia coli (strain K12) GN=yccF PE=1 SV=1	YCCF_ECOLI	Cell inner membrane; Multi-pass membrane protein.	2	7	3.5	5	0.338	8
118	yqjE	Inner membrane protein YqjE OS=Escherichia coli (strain K12) GN=yqjE PE=1 SV=1	YQJE_ECOLI	Cell inner membrane; Multi-pass membrane protein.	2	7	3.5	5	0.187	7
119	yecS	L-cystine transport system permease protein YecS OS=Escherichia coli (strain K12) GN=yecS PE=1 SV=1	YECS_ECOLI	Cell inner membrane {ECO:0000269|PubMed:15919996}; Multi-pass membrane protein {ECO:0000255}.	2	7	3.5	5	0.171	7
120	exbB	Biopolymer transport protein ExbB OS=Escherichia coli (strain K12) GN=exbB PE=1 SV=1	EXBB_ECOLI	Cell inner membrane; Multi-pass membrane protein.	2	7	3.5	5	0.238	7
121	pgpB	Phosphatidylglycerophosphatase B OS=Escherichia coli (strain K12) GN=pgpB PE=1 SV=1	PGPB_ECOLI	Cell inner membrane {ECO:0000269|PubMed:15919996}; Multi-pass membrane protein {ECO:0000269|PubMed:15919996}. Cell outer membrane {ECO:0000269|PubMed:15919996}; Multi-pass membrane protein {ECO:0000269|PubMed:15919996}.	1	6	6	5	0.142	8
122	osmB	Osmotically-inducible lipoprotein B OS=Escherichia coli (strain K12) GN=osmB PE=2 SV=1	OSMB_ECOLI	Cell membrane {ECO:0000305}; Lipid-anchor {ECO:0000305}.	1	6	6	5	0.583	8
123	wecA	Undecaprenyl-phosphate alpha-N-acetylglucosaminyl 1-phosphate transferase OS=Escherichia coli (strain K12) GN=wecA PE=1 SV=1	WECA_ECOLI	Cell inner membrane {ECO:0000255|HAMAP-Rule:MF_02030, ECO:0000269|PubMed:11700352, ECO:0000269|PubMed:15919996, ECO:0000269|PubMed:17237164}; Multi-pass membrane protein {ECO:0000255|HAMAP-Rule:MF_02030}. Note=Localizes to discrete regions in the plasma membrane. {ECO:0000269|PubMed:17237164}.	1	6	6	5	0.057	7
124	cobS	Adenosylcobinamide-GDP ribazoletransferase OS=Escherichia coli (strain K12) GN=cobS PE=2 SV=3	COBS_ECOLI	Cell inner membrane {ECO:0000269|PubMed:15919996}; Multi-pass membrane protein {ECO:0000269|PubMed:15919996}.		5	-	5	0.105	6
125	nimT	2-nitroimidazole transporter OS=Escherichia coli (strain K12) GN=nimT PE=1 SV=1	NIMT_ECOLI	Cell inner membrane {ECO:0000269|PubMed:15919996}; Multi-pass membrane protein {ECO:0000255}.		5	-	5	0.191	7
126	malF	Maltose transport system permease protein MalF OS=Escherichia coli (strain K12) GN=malF PE=1 SV=1	MALF_ECOLI	Cell inner membrane {ECO:0000269|PubMed:18456666}; Multi-pass membrane protein {ECO:0000255|PROSITE-ProRule:PRU00441, ECO:0000269|PubMed:18456666}; Periplasmic side {ECO:0000269|PubMed:18456666}. Note=A substantial portion of it protrudes into the periplasmic space; inserts in an SRP- and Sec-dependent, YidC-independent fashion into the membrane.		5	-	5	0.103	5
127	yccA	Modulator of FtsH protease YccA OS=Escherichia coli (strain K12) GN=yccA PE=1 SV=1	YCCA_ECOLI	Cell inner membrane; Multi-pass membrane protein. Note=There are conflicting results regarding the localization of the C-terminus of this protein: According to a report, the C-terminus localizes in the periplasm (PubMed:10357810). Another report gives the C-terminus in the cytoplasm (PubMed:15919996). We show the periplasmic location. {ECO:0000269|PubMed:10357810, ECO:0000269|PubMed:15919996}.		5	-	5	0.073	5
128	sdhB	Succinate dehydrogenase iron-sulfur subunit OS=Escherichia coli (strain K12) GN=sdhB PE=1 SV=1	SDHB_ECOLI	Cell inner membrane {ECO:0000269|PubMed:16079137}; Peripheral membrane protein {ECO:0000269|PubMed:16079137}.	87	91	1.04598	4	0.899	104
129	nupC	Nucleoside permease NupC OS=Escherichia coli (strain K12) GN=nupC PE=1 SV=1	NUPC_ECOLI	Cell inner membrane {ECO:0000269|PubMed:15919996}; Multi-pass membrane protein {ECO:0000255}.	14	18	1.28571	4	0.27	19
130	ymbA	Uncharacterized lipoprotein YmbA OS=Escherichia coli (strain K12) GN=ymbA PE=3 SV=2	YMBA_ECOLI	Cell membrane {ECO:0000255|PROSITE-ProRule:PRU00303}; Lipid-anchor {ECO:0000255|PROSITE-ProRule:PRU00303}.	8	12	1.5	4	0.283	14
131	kdgT	2-keto-3-deoxygluconate permease OS=Escherichia coli (strain K12) GN=kdgT PE=1 SV=1	KDGT_ECOLI	Cell inner membrane; Multi-pass membrane protein.	7	11	1.57143	4	0.193	11
132	ftsW	Probable peptidoglycan glycosyltransferase FtsW OS=Escherichia coli (strain K12) GN=ftsW PE=1 SV=1	FTSW_ECOLI	Cell inner membrane {ECO:0000255|HAMAP-Rule:MF_00913, ECO:0000269|PubMed:11807049, ECO:0000269|PubMed:12423747, ECO:0000269|PubMed:9603865}; Multi-pass membrane protein {ECO:0000255|HAMAP-Rule:MF_00913, ECO:0000269|PubMed:11807049, ECO:0000269|PubMed:12423747, ECO:0000269|PubMed:9603865}. Note=Localizes to the division septum. Localization requires FtsZ, FtsA, FtsQ and FtsL, but not FtsI.	6	10	1.66667	4	0.338	12
133	rlpA	Endolytic peptidoglycan transglycosylase RlpA OS=Escherichia coli (strain K12) GN=rlpA PE=1 SV=1	RLPA_ECOLI	Cell membrane {ECO:0000255|HAMAP-Rule:MF_02071}; Lipid-anchor {ECO:0000255|HAMAP-Rule:MF_02071, ECO:0000305|PubMed:3316191}. Note=Localizes at the septal ring. Is also associated with some other structures/complexes along the cell cylinder. {ECO:0000269|PubMed:19684127, ECO:0000269|PubMed:19880599}.	5	9	1.8	4	0.251	10
134	ybaY	Uncharacterized lipoprotein YbaY OS=Escherichia coli (strain K12) GN=ybaY PE=3 SV=1	YBAY_ECOLI	Cell membrane {ECO:0000305}; Lipid-anchor {ECO:0000305}.	2	6	3	4	0.326	8
135	kch	Voltage-gated potassium channel Kch OS=Escherichia coli (strain K12) GN=kch PE=1 SV=1 1	KCH_ECOLI	Cell inner membrane {ECO:0000269|PubMed:8824224}; Multi-pass membrane protein {ECO:0000269|PubMed:8824224}.	2	6	3	4	0.165	7
136	clcA	H(+)/Cl(-) exchange transporter ClcA OS=Escherichia coli (strain K12) GN=clcA PE=1 SV=2	CLCA_ECOLI	Cell inner membrane {ECO:0000305}; Multi-pass membrane protein {ECO:0000305}.	2	6	3	4	0.154	7
137	yjiH	Uncharacterized protein YjiH OS=Escherichia coli (strain K12) GN=yjiH PE=4 SV=2	YJIH_ECOLI	Cell membrane {ECO:0000305}; Multi-pass membrane protein {ECO:0000305}.	3	7	2.33333	4	0.159	7
138	yiaD	Probable lipoprotein YiaD OS=Escherichia coli (strain K12) GN=yiaD PE=1 SV=2	YIAD_ECOLI	Cell inner membrane {ECO:0000305}; Multi-pass membrane protein {ECO:0000305}. Cell outer membrane {ECO:0000305}; Lipid-anchor {ECO:0000305}.	1	5	5	4	0.402	5
139	ugpC	sn-glycerol-3-phosphate import ATP-binding protein UgpC OS=Escherichia coli (strain K12) GN=ugpC PE=1 SV=3	UGPC_ECOLI	Cell inner membrane; Peripheral membrane protein.		4	-	4	0.298	7
140	nuoJ	NADH-quinone oxidoreductase subunit J OS=Escherichia coli (strain K12) GN=nuoJ PE=1 SV=1	NUOJ_ECOLI	Cell inner membrane; Multi-pass membrane protein.		4	-	4	0.272	6
141	galP	Galactose-proton symporter OS=Escherichia coli (strain K12) GN=galP PE=1 SV=1	GALP_ECOLI	Cell inner membrane {ECO:0000269|PubMed:15919996}; Multi-pass membrane protein {ECO:0000269|PubMed:15919996}.		4	-	4	0.058	6
142	ybhL	Inner membrane protein YbhL OS=Escherichia coli (strain K12) GN=ybhL PE=1 SV=1	YBHL_ECOLI	Cell inner membrane; Multi-pass membrane protein.		4	-	4	0.154	5
143	yeeA	Inner membrane protein YeeA OS=Escherichia coli (strain K12) GN=yeeA PE=1 SV=2	YEEA_ECOLI	Cell inner membrane; Multi-pass membrane protein.		4	-	4	0.261	5
144	rseC	Protein RseC OS=Escherichia coli (strain K12) GN=rseC PE=1 SV=1	RSEC_ECOLI	Cell inner membrane; Multi-pass membrane protein.		4	-	4	0.252	4
145	yohK	Inner membrane protein YohK OS=Escherichia coli (strain K12) GN=yohK PE=1 SV=1	YOHK_ECOLI	Cell inner membrane; Multi-pass membrane protein.		4	-	4	0.312	4
146	ccmC	Heme exporter protein C OS=Escherichia coli (strain K12) GN=ccmC PE=1 SV=1	CCMC_ECOLI	Cell inner membrane; Multi-pass membrane protein.		4	-	4	0.049	4
147	dedD	Cell division protein DedD OS=Escherichia coli (strain K12) GN=dedD PE=3 SV=2	DEDD_ECOLI	Cell inner membrane {ECO:0000255|HAMAP-Rule:MF_02022, ECO:0000305}; Single-pass membrane protein {ECO:0000255|HAMAP-Rule:MF_02022}. Note=Localizes at the septal ring. {ECO:0000255|HAMAP-Rule:MF_02022, ECO:0000269|PubMed:19684127, ECO:0000269|PubMed:19880599}.	11	14	1.27273	3	0.577	17
148	nuoA	NADH-quinone oxidoreductase subunit A OS=Escherichia coli (strain K12) GN=nuoA PE=3 SV=1	NUOA_ECOLI	Cell inner membrane {ECO:0000255|HAMAP-Rule:MF_01394, ECO:0000269|PubMed:15919996}; Multi-pass membrane protein {ECO:0000255|HAMAP-Rule:MF_01394, ECO:0000269|PubMed:15919996}.	11	14	1.27273	3	0.558	15
149	lgt	Prolipoprotein diacylglyceryl transferase OS=Escherichia coli (strain K12) GN=lgt PE=1 SV=1 1	LGT_ECOLI	Cell inner membrane {ECO:0000269|PubMed:15919996, ECO:0000269|PubMed:22287519}; Multi-pass membrane protein {ECO:0000269|PubMed:22287519}.	11	14	1.27273	3	0.32	14
150	yfdI	Uncharacterized protein YfdI OS=Escherichia coli (strain K12) GN=yfdI PE=4 SV=1	YFDI_ECOLI	Cell membrane {ECO:0000305}; Multi-pass membrane protein {ECO:0000305}.	8	11	1.375	3	0.384	12
151	fetB	Probable iron export permease protein FetB OS=Escherichia coli (strain K12) GN=fetB PE=1 SV=2	FETB_ECOLI	Cell inner membrane {ECO:0000269|PubMed:24038693}; Multi-pass membrane protein {ECO:0000269|PubMed:24038693}.	6	9	1.5	3	0.34	10
152	secE	Protein translocase subunit SecE OS=Escherichia coli (strain K12) GN=secE PE=1 SV=1	SECE_ECOLI	Cell inner membrane {ECO:0000255|HAMAP-Rule:MF_00422, ECO:0000269|PubMed:15919996}; Multi-pass membrane protein {ECO:0000255|HAMAP-Rule:MF_00422, ECO:0000269|PubMed:15919996}.	6	9	1.5	3	0.441	10
153	nuoH	NADH-quinone oxidoreductase subunit H OS=Escherichia coli (strain K12) GN=nuoH PE=1 SV=1	NUOH_ECOLI	Cell inner membrane; Multi-pass membrane protein.	5	8	1.6	3	0.083	9
154	dctA	Aerobic C4-dicarboxylate transport protein OS=Escherichia coli (strain K12) GN=dctA PE=1 SV=1	DCTA_ECOLI	Cell inner membrane {ECO:0000269|PubMed:15919996}; Multi-pass membrane protein {ECO:0000269|PubMed:15919996}.	5	8	1.6	3	0.213	9
155	ybbJ	Inner membrane protein YbbJ OS=Escherichia coli (strain K12) GN=ybbJ PE=1 SV=2	YBBJ_ECOLI	Cell inner membrane; Multi-pass membrane protein.	3	6	2	3	0.296	6
156	pheP	Phenylalanine-specific permease OS=Escherichia coli (strain K12) GN=pheP PE=1 SV=1	PHEP_ECOLI	Cell inner membrane; Multi-pass membrane protein.	2	5	2.5	3	0.107	5
157	mrdB	Peptidoglycan glycosyltransferase MrdB OS=Escherichia coli (strain K12) GN=mrdB PE=1 SV=1	RODA_ECOLI	Cell inner membrane {ECO:0000255|HAMAP-Rule:MF_02079, ECO:0000269|PubMed:6348029}; Multi-pass membrane protein {ECO:0000255|HAMAP-Rule:MF_02079}.	2	5	2.5	3	0.143	5
158	yfgG	Uncharacterized protein YfgG OS=Escherichia coli (strain K12) GN=yfgG PE=4 SV=1	YFGG_ECOLI	Membrane {ECO:0000305}; Single-pass membrane protein {ECO:0000305}.	2	5	2.5	3	0.254	5
159	yhhN	Uncharacterized membrane protein YhhN OS=Escherichia coli (strain K12) GN=yhhN PE=3 SV=1	YHHN_ECOLI	Cell membrane {ECO:0000305}; Multi-pass membrane protein {ECO:0000305}.	3	6	2	3	0.101	6
160	nuoM	NADH-quinone oxidoreductase subunit M OS=Escherichia coli (strain K12) GN=nuoM PE=1 SV=1	NUOM_ECOLI	Cell inner membrane; Multi-pass membrane protein.	1	4	4	3	0.092	6
161	ubiA	4-hydroxybenzoate octaprenyltransferase OS=Escherichia coli (strain K12) GN=ubiA PE=1 SV=1	UBIA_ECOLI	Cell inner membrane {ECO:0000255|HAMAP-Rule:MF_01635}; Multi-pass membrane protein {ECO:0000255|HAMAP-Rule:MF_01635}.	1	4	4	3	0.238	4
162	lysP	Lysine-specific permease OS=Escherichia coli (strain K12) GN=lysP PE=1 SV=5	LYSP_ECOLI	Cell inner membrane; Multi-pass membrane protein.		3	-	3	0.031	5
163	mdtC	Multidrug resistance protein MdtC OS=Escherichia coli (strain K12) GN=mdtC PE=1 SV=1	MDTC_ECOLI	Cell inner membrane; Multi-pass membrane protein.		3	-	3	0.09	4
164	ulaA	Ascorbate-specific PTS system EIIC component OS=Escherichia coli (strain K12) GN=ulaA PE=1 SV=3	ULAA_ECOLI	Cell inner membrane {ECO:0000269|PubMed:15919996}; Multi-pass membrane protein {ECO:0000269|PubMed:15919996}.		3	-	3	0.092	3
165	yghJ	Putative lipoprotein AcfD homolog OS=Escherichia coli (strain K12) GN=yghJ PE=3 SV=1	ACFD_ECOLI	Cell membrane {ECO:0000255|PROSITE-ProRule:PRU00303}; Lipid-anchor {ECO:0000255|PROSITE-ProRule:PRU00303}.	1	4	4	3	0.046	4
166	yjcC	Putative cyclic-di-GMP phosphodiesterase YjcC OS=Escherichia coli (strain K12) GN=yjcC PE=1 SV=2	YJCC_ECOLI	Cell inner membrane {ECO:0000305}; Multi-pass membrane protein {ECO:0000305}.	1	4	4	3	0.076	4
167	srlA	PTS system glucitol/sorbitol-specific EIIC component OS=Escherichia coli (strain K12) GN=srlA PE=1 SV=1	PTHC_ECOLI	Cell inner membrane {ECO:0000255|PROSITE-ProRule:PRU00430, ECO:0000305|PubMed:3553176}; Multi-pass membrane protein {ECO:0000255|PROSITE-ProRule:PRU00430, ECO:0000305|PubMed:3553176}.		3	-	3	0.118	3
168	phoR	Phosphate regulon sensor protein PhoR OS=Escherichia coli (strain K12) GN=phoR PE=1 SV=1	PHOR_ECOLI	Cell inner membrane {ECO:0000269|PubMed:2187152}; Multi-pass membrane protein {ECO:0000269|PubMed:2187152}.		3	-	3	0.139	3
169	yqhA	UPF0114 protein YqhA OS=Escherichia coli (strain K12) GN=yqhA PE=3 SV=1	YQHA_ECOLI	Cell membrane {ECO:0000305}; Multi-pass membrane protein {ECO:0000305}.		3	-	3	0.104	3
170	dedA	Protein DedA OS=Escherichia coli (strain K12) GN=dedA PE=1 SV=1	DEDA_ECOLI	Cell inner membrane; Multi-pass membrane protein.		3	-	3	0.091	3
171	gltS	Sodium/glutamate symporter OS=Escherichia coli (strain K12) GN=gltS PE=1 SV=1	GLTS_ECOLI	Cell inner membrane {ECO:0000255|HAMAP-Rule:MF_02062, ECO:0000269|PubMed:15919996, ECO:0000269|PubMed:17269795, ECO:0000269|PubMed:17662058, ECO:0000269|PubMed:2537813}; Multi-pass membrane protein {ECO:0000255|HAMAP-Rule:MF_02062, ECO:0000269|PubMed:17269795, ECO:0000269|PubMed:17662058}.		3	-	3	0.062	3
172	uhpB	Signal transduction histidine-protein kinase/phosphatase UhpB OS=Escherichia coli (strain K12) GN=uhpB PE=1 SV=3	UHPB_ECOLI	Cell inner membrane {ECO:0000269|PubMed:15919996}; Multi-pass membrane protein {ECO:0000255}.		3	-	3	0.11	3
173	rarD	Protein RarD OS=Escherichia coli (strain K12) GN=rarD PE=1 SV=2	RARD_ECOLI	Cell inner membrane; Multi-pass membrane protein.		3	-	3	0.338	3
174	dmsC	Anaerobic dimethyl sulfoxide reductase chain C OS=Escherichia coli (strain K12) GN=dmsC PE=1 SV=1	DMSC_ECOLI	Cell inner membrane; Multi-pass membrane protein.		3	-	3	0.164	3
175	mdtG	Multidrug resistance protein MdtG OS=Escherichia coli (strain K12) GN=mdtG PE=3 SV=1	MDTG_ECOLI	Cell inner membrane {ECO:0000305}; Multi-pass membrane protein {ECO:0000305}.		3	-	3	0.145	3
176	mlaE	Probable phospholipid ABC transporter permease protein MlaE OS=Escherichia coli (strain K12) GN=mlaE PE=1 SV=1	MLAE_ECOLI	Cell inner membrane {ECO:0000269|PubMed:19383799}; Multi-pass membrane protein {ECO:0000255, ECO:0000269|PubMed:19383799}.		3	-	3	0.046	3
177	betT	High-affinity choline transport protein OS=Escherichia coli (strain K12) GN=betT PE=2 SV=1	BETT_ECOLI	Cell inner membrane {ECO:0000269|PubMed:15919996}; Multi-pass membrane protein {ECO:0000269|PubMed:15919996}.		3	-	3	0.037	3
178	sieB	Superinfection exclusion protein B OS=Escherichia coli (strain K12) GN=sieB PE=4 SV=2	SIEB_ECOLI	Cell inner membrane {ECO:0000269|PubMed:15919996}; Multi-pass membrane protein {ECO:0000269|PubMed:15919996}.		3	-	3	0.179	3
179	mltG	Endolytic murein transglycosylase OS=Escherichia coli (strain K12) GN=mltG PE=1 SV=2	MLTG_ECOLI	Cell inner membrane {ECO:0000255|HAMAP-Rule:MF_02065, ECO:0000269|PubMed:26507882}; Single-pass membrane protein {ECO:0000255|HAMAP-Rule:MF_02065, ECO:0000269|PubMed:26507882}.	13	15	1.15385	2	0.379	21
180	zipA	Cell division protein ZipA OS=Escherichia coli (strain K12) GN=zipA PE=1 SV=3	ZIPA_ECOLI	Cell inner membrane {ECO:0000269|PubMed:16079137, ECO:0000269|PubMed:9008158}; Single-pass type I membrane protein {ECO:0000269|PubMed:9008158}. Note=Localizes to the Z ring in an FtsZ-dependent manner (PubMed:9008158, PubMed:9864327, PubMed:10209756). Localization does not depend upon FtsA or FtsI (PubMed:9864327, PubMed:10209756). {ECO:0000269|PubMed:10209756, ECO:0000269|PubMed:9008158, ECO:00…	12	14	1.16667	2	0.384	19
181	ybbP	Uncharacterized ABC transporter permease YbbP OS=Escherichia coli (strain K12) GN=ybbP PE=3 SV=1	YBBP_ECOLI	Cell membrane {ECO:0000305}; Multi-pass membrane protein {ECO:0000305}.	10	12	1.2	2	0.18	14
182	mdtK	Multidrug resistance protein MdtK OS=Escherichia coli (strain K12) GN=mdtK PE=1 SV=2	MDTK_ECOLI	Cell inner membrane {ECO:0000269|PubMed:15919996}; Multi-pass membrane protein {ECO:0000305|PubMed:15919996}.	8	10	1.25	2	0.103	11
183	dsbE	Thiol:disulfide interchange protein DsbE OS=Escherichia coli (strain K12) GN=dsbE PE=1 SV=1	DSBE_ECOLI	Cell inner membrane; Single-pass membrane protein; Periplasmic side.	8	10	1.25	2	0.389	10
184	dgkA	Diacylglycerol kinase OS=Escherichia coli (strain K12) GN=dgkA PE=1 SV=2	KDGL_ECOLI	Cell inner membrane; Multi-pass membrane protein.	5	7	1.4	2	0.23	8
185	eptB	Kdo(2)-lipid A phosphoethanolamine 7''-transferase OS=Escherichia coli (strain K12) GN=eptB PE=1 SV=3	EPTB_ECOLI	Cell inner membrane {ECO:0000269|PubMed:15795227}; Multi-pass membrane protein {ECO:0000269|PubMed:15795227}.	4	6	1.5	2	0.183	9
186	aer	Aerotaxis receptor OS=Escherichia coli (strain K12) GN=aer PE=1 SV=1 0	AER_ECOLI	Cell inner membrane {ECO:0000269|PubMed:22380631}; Multi-pass membrane protein {ECO:0000269|PubMed:22380631}. Note=Predominantly localized to one cell pole in mid-to-late exponential phase, with a few smaller foci elsewhere in the cell.	4	6	1.5	2	0.166	6
187	evgS	Sensor protein EvgS OS=Escherichia coli (strain K12) GN=evgS PE=1 SV=2	EVGS_ECOLI	Cell inner membrane {ECO:0000305}; Multi-pass membrane protein {ECO:0000305}.	2	4	2	2	0.099	5
188	rfaL	O-antigen ligase OS=Escherichia coli (strain K12) GN=rfaL PE=1 SV=2	RFAL_ECOLI	Cell inner membrane; Multi-pass membrane protein.	2	4	2	2	0.055	4
189	cycA	D-serine/D-alanine/glycine transporter OS=Escherichia coli (strain K12) GN=cycA PE=1 SV=1	CYCA_ECOLI	Cell inner membrane {ECO:0000269|PubMed:15919996}; Multi-pass membrane protein.	2	4	2	2	0.032	4
190	envZ	Osmolarity sensor protein EnvZ OS=Escherichia coli (strain K12) GN=envZ PE=1 SV=1	ENVZ_ECOLI	Cell inner membrane; Multi-pass membrane protein.	2	4	2	2	0.171	4
191	ydcL	Uncharacterized lipoprotein YdcL OS=Escherichia coli (strain K12) GN=ydcL PE=3 SV=1	YDCL_ECOLI	Cell membrane {ECO:0000305}; Lipid-anchor {ECO:0000305}.	2	4	2	2	0.383	4
192	tnaB	Low affinity tryptophan permease OS=Escherichia coli (strain K12) GN=tnaB PE=1 SV=1	TNAB_ECOLI	Cell inner membrane; Multi-pass membrane protein.	2	4	2	2	0.133	4
193	yigM	Uncharacterized membrane protein YigM OS=Escherichia coli (strain K12) GN=yigM PE=4 SV=1	YIGM_ECOLI	Cell membrane {ECO:0000305}; Multi-pass membrane protein {ECO:0000305}.	2	4	2	2	0.047	4
194	ygaM	Uncharacterized protein YgaM OS=Escherichia coli (strain K12) GN=ygaM PE=1 SV=2	YGAM_ECOLI	Cell inner membrane {ECO:0000305}; Single-pass membrane protein {ECO:0000305}.	2	4	2	2	0.339	4
195	znuC	Zinc import ATP-binding protein ZnuC OS=Escherichia coli (strain K12) GN=znuC PE=1 SV=1	ZNUC_ECOLI	Cell inner membrane {ECO:0000255|HAMAP-Rule:MF_01725}; Peripheral membrane protein {ECO:0000255|HAMAP-Rule:MF_01725}.	1	3	3	2	0.191	4
196	gltP	Proton/glutamate-aspartate symporter OS=Escherichia coli (strain K12) GN=gltP PE=1 SV=2	GLTP_ECOLI	Cell inner membrane {ECO:0000255|HAMAP-Rule:MF_02063, ECO:0000269|PubMed:15919996, ECO:0000269|PubMed:1971622, ECO:0000269|PubMed:2537813}; Multi-pass membrane protein {ECO:0000255|HAMAP-Rule:MF_02063}.	1	3	3	2	0.076	4
197	ygfX	Inner membrane protein YgfX OS=Escherichia coli (strain K12) GN=ygfX PE=1 SV=1	YGFX_ECOLI	Cell inner membrane {ECO:0000269|PubMed:22239607}; Multi-pass membrane protein {ECO:0000269|PubMed:22239607}.	1	3	3	2	0.148	4
198	ypdA	Sensor histidine kinase YpdA OS=Escherichia coli (strain K12) GN=ypdA PE=1 SV=1	YPDA_ECOLI	Cell inner membrane {ECO:0000269|PubMed:15919996}; Multi-pass membrane protein {ECO:0000255}.	1	3	3	2	0.085	4
199	kefC	Glutathione-regulated potassium-efflux system protein KefC OS=Escherichia coli (strain K12) GN=kefC PE=1 SV=2	KEFC_ECOLI	Cell inner membrane {ECO:0000255|HAMAP-Rule:MF_01413, ECO:0000269|PubMed:15919996, ECO:0000269|PubMed:2046548}; Multi-pass membrane protein {ECO:0000255|HAMAP-Rule:MF_01413, ECO:0000269|PubMed:15919996, ECO:0000269|PubMed:2046548}.	1	3	3	2	0.084	3
200	glcA	Glycolate permease GlcA OS=Escherichia coli (strain K12) GN=glcA PE=1 SV=1	GLCA_ECOLI	Cell inner membrane; Multi-pass membrane protein.		2	-	2	0.121	3
201	ftsX	Cell division protein FtsX OS=Escherichia coli (strain K12) GN=ftsX PE=1 SV=1	FTSX_ECOLI	Cell inner membrane {ECO:0000269|PubMed:10048040, ECO:0000269|PubMed:14729705, ECO:0000269|PubMed:3323846}; Multi-pass membrane protein {ECO:0000269|PubMed:10048040, ECO:0000269|PubMed:14729705, ECO:0000269|PubMed:3323846}. Note=Localizes to the septal ring at the later stages of cell growth and remains there until division is complete. This localization is dependent on localization of FtsZ, FtsA…	18	19	1.05556	1	0.312	21
202	lptF	Lipopolysaccharide export system permease protein LptF OS=Escherichia coli (strain K12) GN=lptF PE=1 SV=1	LPTF_ECOLI	Cell inner membrane; Multi-pass membrane protein.	8	9	1.125	1	0.432	12
203	csrD	RNase E specificity factor CsrD OS=Escherichia coli (strain K12) GN=csrD PE=1 SV=2	CSRD_ECOLI	Cell membrane {ECO:0000305}; Multi-pass membrane protein {ECO:0000305}.	6	7	1.16667	1	0.127	9
204	yajR	Inner membrane transport protein YajR OS=Escherichia coli (strain K12) GN=yajR PE=1 SV=2	YAJR_ECOLI	Cell inner membrane; Multi-pass membrane protein.	4	5	1.25	1	0.126	7
205	mtr	Tryptophan-specific transport protein OS=Escherichia coli (strain K12) GN=mtr PE=1 SV=1 1	MTR_ECOLI	Cell inner membrane; Multi-pass membrane protein.	4	5	1.25	1	0.068	6
206	fliO	Flagellar protein FliO OS=Escherichia coli (strain K12) GN=fliO PE=3 SV=3	FLIO_ECOLI	Cell membrane {ECO:0000305}; Single-pass membrane protein {ECO:0000305}. Bacterial flagellum basal body {ECO:0000250}.	4	5	1.25	1	0.496	5
207	alsA	D-allose import ATP-binding protein AlsA OS=Escherichia coli (strain K12) GN=alsA PE=3 SV=2	ALSA_ECOLI	Cell inner membrane {ECO:0000250}; Peripheral membrane protein {ECO:0000250}.	3	4	1.33333	1	0.233	4
208	ccmE	Cytochrome c-type biogenesis protein CcmE OS=Escherichia coli (strain K12) GN=ccmE PE=1 SV=1	CCME_ECOLI	Cell inner membrane {ECO:0000255|HAMAP-Rule:MF_01959}; Single-pass type II membrane protein {ECO:0000255|HAMAP-Rule:MF_01959}; Periplasmic side {ECO:0000255|HAMAP-Rule:MF_01959}. Note=Stabilized by CcmD in the membrane.	3	4	1.33333	1	0.195	4
209	nupG	Nucleoside permease NupG OS=Escherichia coli (strain K12) GN=nupG PE=1 SV=1	NUPG_ECOLI	Cell inner membrane {ECO:0000255|HAMAP-Rule:MF_02049, ECO:0000269|PubMed:15513740, ECO:0000269|PubMed:15919996, ECO:0000269|PubMed:3311747}; Multi-pass membrane protein {ECO:0000255|HAMAP-Rule:MF_02049}.	2	3	1.5	1	0.115	3
210	narV	Respiratory nitrate reductase 2 gamma chain OS=Escherichia coli (strain K12) GN=narV PE=1 SV=1	NARV_ECOLI	Cell inner membrane; Multi-pass membrane protein.	2	3	1.5	1	0.274	3
211	yjjP	Inner membrane protein YjjP OS=Escherichia coli (strain K12) GN=yjjP PE=1 SV=1	YJJP_ECOLI	Cell inner membrane; Multi-pass membrane protein.	2	3	1.5	1	0.203	4
212	rfc	O-antigen polymerase OS=Escherichia coli (strain K12) GN=rfc PE=4 SV=1 0	RFC_ECOLI	Cell inner membrane {ECO:0000269|PubMed:15919996}; Multi-pass membrane protein {ECO:0000269|PubMed:15919996}.	2	3	1.5	1	0.023	3
213	mdtB	Multidrug resistance protein MdtB OS=Escherichia coli (strain K12) GN=mdtB PE=1 SV=1	MDTB_ECOLI	Cell inner membrane {ECO:0000255|HAMAP-Rule:MF_01423}; Multi-pass membrane protein {ECO:0000255|HAMAP-Rule:MF_01423}.	2	3	1.5	1	0.056	3
214	manY	PTS system mannose-specific EIIC component OS=Escherichia coli (strain K12) GN=manY PE=1 SV=1	PTNC_ECOLI	Cell inner membrane {ECO:0000255|PROSITE-ProRule:PRU00429, ECO:0000269|PubMed:15919996}; Multi-pass membrane protein {ECO:0000255|PROSITE-ProRule:PRU00429, ECO:0000269|PubMed:15919996}.	2	3	1.5	1	0.071	3
215	yijD	Inner membrane protein YijD OS=Escherichia coli (strain K12) GN=yijD PE=1 SV=1	YIJD_ECOLI	Cell inner membrane {ECO:0000269|PubMed:15919996}; Multi-pass membrane protein {ECO:0000305}.	2	3	1.5	1	0.437	3
216	rfbX	Putative O-antigen transporter OS=Escherichia coli (strain K12) GN=rfbX PE=1 SV=4	RFBX_ECOLI	Cell inner membrane; Multi-pass membrane protein.	2	3	1.5	1	0.173	3
217	murP	PTS system N-acetylmuramic acid-specific EIIBC component OS=Escherichia coli (strain K12) GN=murP PE=1 SV=1	PTYBC_ECOLI	Cell inner membrane {ECO:0000255|PROSITE-ProRule:PRU00426}; Multi-pass membrane protein {ECO:0000255|PROSITE-ProRule:PRU00426}.	2	3	1.5	1	0.146	3
218	nanT	Sialic acid transporter NanT OS=Escherichia coli (strain K12) GN=nanT PE=1 SV=2	NANT_ECOLI	Cell inner membrane {ECO:0000255|HAMAP-Rule:MF_01238, ECO:0000269|PubMed:15919996}; Multi-pass membrane protein {ECO:0000255|HAMAP-Rule:MF_01238}.	1	2	2	1	0.048	3
219	dmsA	Dimethyl sulfoxide reductase DmsA OS=Escherichia coli (strain K12) GN=dmsA PE=1 SV=2	DMSA_ECOLI	Cell membrane {ECO:0000269|PubMed:2170332, ECO:0000269|PubMed:3280546}; Peripheral membrane protein {ECO:0000269|PubMed:2170332, ECO:0000269|PubMed:3280546}; Cytoplasmic side {ECO:0000269|PubMed:2170332, ECO:0000269|PubMed:3280546}.	57	57	1	0	0.37	63
220	fliL	Flagellar protein FliL OS=Escherichia coli (strain K12) GN=fliL PE=3 SV=1	FLIL_ECOLI	Cell inner membrane {ECO:0000305}; Single-pass membrane protein {ECO:0000305}.	24	24	1	0	0.61	28
221	mreC	Cell shape-determining protein MreC OS=Escherichia coli (strain K12) GN=mreC PE=1 SV=1	MREC_ECOLI	Cell inner membrane {ECO:0000269|PubMed:15612918}; Single-pass membrane protein {ECO:0000269|PubMed:15612918}.	23	23	1	0	0.477	24
222	atpC	ATP synthase epsilon chain OS=Escherichia coli (strain K12) GN=atpC PE=1 SV=2	ATPE_ECOLI	Cell inner membrane {ECO:0000269|PubMed:16079137, ECO:0000269|PubMed:21778229}; Peripheral membrane protein {ECO:0000269|PubMed:16079137, ECO:0000269|PubMed:21778229}.	17	17	1	0	0.719	17
223	nuoL	NADH-quinone oxidoreductase subunit L OS=Escherichia coli (strain K12) GN=nuoL PE=1 SV=2	NUOL_ECOLI	Cell inner membrane; Multi-pass membrane protein.	7	7	1	0	0.184	8
224	narZ	Respiratory nitrate reductase 2 alpha chain OS=Escherichia coli (strain K12) GN=narZ PE=1 SV=5	NARZ_ECOLI	Cell membrane; Peripheral membrane protein.	6	6	1	0	0.188	6
225	nuoN	NADH-quinone oxidoreductase subunit N OS=Escherichia coli (strain K12) GN=nuoN PE=1 SV=2	NUON_ECOLI	Cell inner membrane; Multi-pass membrane protein.	6	6	1	0	0.192	7
226	fieF	Ferrous-iron efflux pump FieF OS=Escherichia coli (strain K12) GN=fieF PE=1 SV=1	FIEF_ECOLI	Cell inner membrane; Multi-pass membrane protein.	4	4	1	0	0.253	5
227	ccmH	Cytochrome c-type biogenesis protein CcmH OS=Escherichia coli (strain K12) GN=ccmH PE=1 SV=1	CCMH_ECOLI	Cell inner membrane; Multi-pass membrane protein.	4	4	1	0	0.28	4
228	pgpC	Phosphatidylglycerophosphatase C OS=Escherichia coli (strain K12) GN=pgpC PE=1 SV=1	PGPC_ECOLI	Cell inner membrane {ECO:0000269|PubMed:21148555}; Single-pass membrane protein {ECO:0000269|PubMed:21148555}.	4	4	1	0	0.147	4
229	hisP	Histidine transport ATP-binding protein HisP OS=Escherichia coli (strain K12) GN=hisP PE=1 SV=2	HISP_ECOLI	Cell inner membrane; Peripheral membrane protein.		0	-	0	0.28	6
230	ydjN	L-cystine transporter YdjN OS=Escherichia coli (strain K12) GN=ydjN PE=3 SV=1	YDJN_ECOLI	Cell membrane {ECO:0000305}; Multi-pass membrane protein {ECO:0000255}.	32	31	0.96875	-1	0.365	34
231	yjcE	Uncharacterized Na(+)/H(+) exchanger YjcE OS=Escherichia coli (strain K12) GN=yjcE PE=3 SV=1	YJCE_ECOLI	Cell inner membrane {ECO:0000305}; Multi-pass membrane protein {ECO:0000305}.	15	14	0.933333	-1	0.191	16
232	ycjF	UPF0283 membrane protein YcjF OS=Escherichia coli (strain K12) GN=ycjF PE=1 SV=1	YCJF_ECOLI	Cell inner membrane; Multi-pass membrane protein.	11	10	0.909091	-1	0.32	13
233	yhfK	Uncharacterized protein YhfK OS=Escherichia coli (strain K12) GN=yhfK PE=3 SV=2	YHFK_ECOLI	Cell membrane {ECO:0000305}; Multi-pass membrane protein {ECO:0000305}.	7	6	0.857143	-1	0.137	7
234	cpxA	Sensor histidine kinase CpxA OS=Escherichia coli (strain K12) GN=cpxA PE=1 SV=1	CPXA_ECOLI	Cell inner membrane {ECO:0000269|PubMed:15919996, ECO:0000269|PubMed:25207645, ECO:0000269|PubMed:3058985}; Multi-pass membrane protein {ECO:0000305|PubMed:15919996, ECO:0000305|PubMed:3058985}.	9	8	0.888889	-1	0.201	9
235	yceB	Uncharacterized lipoprotein YceB OS=Escherichia coli (strain K12) GN=yceB PE=1 SV=1	YCEB_ECOLI	Cell membrane {ECO:0000255|PROSITE-ProRule:PRU00303}; Lipid-anchor {ECO:0000255|PROSITE-ProRule:PRU00303}.	5	4	0.8	-1	0.269	5
236	plsY	Probable glycerol-3-phosphate acyltransferase OS=Escherichia coli (strain K12) GN=plsY PE=1 SV=1	PLSY_ECOLI	Cell inner membrane; Multi-pass membrane protein.	5	4	0.8	-1	0.317	5
237	yedV	Probable sensor-like histidine kinase YedV OS=Escherichia coli (strain K12) GN=yedV PE=1 SV=1	YEDV_ECOLI	Cell inner membrane; Multi-pass membrane protein.	4	3	0.75	-1	0.15	4
238	dcuB	Anaerobic C4-dicarboxylate transporter DcuB OS=Escherichia coli (strain K12) GN=dcuB PE=1 SV=1	DCUB_ECOLI	Cell inner membrane; Multi-pass membrane protein.	4	3	0.75	-1	0.056	4
239	rsxB	Electron transport complex subunit RsxB OS=Escherichia coli (strain K12) GN=rsxB PE=1 SV=1	RSXB_ECOLI	Cell inner membrane {ECO:0000255|HAMAP-Rule:MF_00463}; Peripheral membrane protein {ECO:0000255|HAMAP-Rule:MF_00463}.	4	3	0.75	-1	0.198	4
240	acrF	Multidrug export protein AcrF OS=Escherichia coli (strain K12) GN=acrF PE=1 SV=2	ACRF_ECOLI	Cell inner membrane {ECO:0000269|PubMed:11274125, ECO:0000269|PubMed:15919996}; Multi-pass membrane protein {ECO:0000269|PubMed:11274125, ECO:0000269|PubMed:15919996}.	3	2	0.666667	-1	0.091	3
241	yhjK	Protein YhjK OS=Escherichia coli (strain K12) GN=yhjK PE=1 SV=3	YHJK_ECOLI	Cell membrane {ECO:0000305}; Multi-pass membrane protein {ECO:0000305}.	3	2	0.666667	-1	0.092	3
242	tatE	Sec-independent protein translocase protein TatE OS=Escherichia coli (strain K12) GN=tatE PE=2 SV=1	TATE_ECOLI	Cell inner membrane {ECO:0000255|HAMAP-Rule:MF_00903}; Single-pass membrane protein {ECO:0000255|HAMAP-Rule:MF_00903}.	3	2	0.666667	-1	0.328	3
243	hemY	Protein HemY OS=Escherichia coli (strain K12) GN=hemY PE=1 SV=1	HEMY_ECOLI	Cell inner membrane; Multi-pass membrane protein.	38	36	0.947368	-2	0.485	42
244	clsA	Cardiolipin synthase A OS=Escherichia coli (strain K12) GN=clsA PE=1 SV=1	CLSA_ECOLI	Cell inner membrane {ECO:0000255|HAMAP-Rule:MF_00190, ECO:0000269|PubMed:15919996, ECO:0000269|PubMed:1663113, ECO:0000269|PubMed:19341704}; Multi-pass membrane protein {ECO:0000255|HAMAP-Rule:MF_00190, ECO:0000269|PubMed:15919996, ECO:0000269|PubMed:1663113}.	21	19	0.904762	-2	0.28	21
245	rbsC	Ribose import permease protein RbsC OS=Escherichia coli (strain K12) GN=rbsC PE=1 SV=1	RBSC_ECOLI	Cell inner membrane {ECO:0000269|PubMed:15919996, ECO:0000269|PubMed:9922273}; Multi-pass membrane protein {ECO:0000305|PubMed:9922273}.	10	8	0.8	-2	0.168	10
246	lapA	Lipopolysaccharide assembly protein A OS=Escherichia coli (strain K12) GN=lapA PE=1 SV=1	LAPA_ECOLI	Cell inner membrane {ECO:0000255|HAMAP-Rule:MF_01948, ECO:0000269|PubMed:15919996, ECO:0000269|PubMed:24722986}; Multi-pass membrane protein {ECO:0000255|HAMAP-Rule:MF_01948}. Note=Copurifies with LptE/LptD, LptBFGC, LptA, DnaK/DnaJ and LPS. {ECO:0000269|PubMed:24722986}.	8	6	0.75	-2	0.225	8
247	yedD	Uncharacterized lipoprotein YedD OS=Escherichia coli (strain K12) GN=yedD PE=3 SV=1	YEDD_ECOLI	Cell membrane {ECO:0000255|PROSITE-ProRule:PRU00303}; Lipid-anchor {ECO:0000255|PROSITE-ProRule:PRU00303}.	8	6	0.75	-2	0.54	8
248	narI	Respiratory nitrate reductase 1 gamma chain OS=Escherichia coli (strain K12) GN=narI PE=1 SV=1	NARI_ECOLI	Cell inner membrane; Multi-pass membrane protein.	7	5	0.714286	-2	0.28	7
249	yfbV	UPF0208 membrane protein YfbV OS=Escherichia coli (strain K12) GN=yfbV PE=1 SV=1	YFBV_ECOLI	Cell inner membrane; Multi-pass membrane protein.	6	4	0.666667	-2	0.172	6
250	murJ	Lipid II flippase MurJ OS=Escherichia coli (strain K12) GN=murJ PE=1 SV=1	MURJ_ECOLI	Cell inner membrane {ECO:0000255|HAMAP-Rule:MF_02078, ECO:0000269|PubMed:15919996, ECO:0000269|PubMed:23935042}; Multi-pass membrane protein {ECO:0000255|HAMAP-Rule:MF_02078, ECO:0000269|PubMed:15919996, ECO:0000269|PubMed:23935042}.	6	4	0.666667	-2	0.235	6
251	ypjD	Inner membrane protein YpjD OS=Escherichia coli (strain K12) GN=ypjD PE=1 SV=1	YPJD_ECOLI	Cell inner membrane; Multi-pass membrane protein.	4	2	0.5	-2	0.076	4
252	tatC	Sec-independent protein translocase protein TatC OS=Escherichia coli (strain K12) GN=tatC PE=1 SV=2	TATC_ECOLI	Cell inner membrane {ECO:0000255|HAMAP-Rule:MF_00902, ECO:0000269|PubMed:11591389, ECO:0000269|PubMed:15225613, ECO:0000269|PubMed:20169075}; Multi-pass membrane protein {ECO:0000255|HAMAP-Rule:MF_00902, ECO:0000269|PubMed:11591389, ECO:0000269|PubMed:15225613, ECO:0000269|PubMed:20169075}. Note=Localizes at the cell poles.	4	2	0.5	-2	0.066	4
253	glnP	Glutamine transport system permease protein GlnP OS=Escherichia coli (strain K12) GN=glnP PE=1 SV=1	GLNP_ECOLI	Cell inner membrane; Multi-pass membrane protein.	3	1	0.333333	-2	0.301	3
254	yoaE	UPF0053 inner membrane protein YoaE OS=Escherichia coli (strain K12) GN=yoaE PE=1 SV=1	YOAE_ECOLI	Cell inner membrane; Multi-pass membrane protein.	3	1	0.333333	-2	0.097	3
255	ylaC	Inner membrane protein YlaC OS=Escherichia coli (strain K12) GN=ylaC PE=1 SV=2	YLAC_ECOLI	Cell inner membrane; Multi-pass membrane protein.	18	15	0.833333	-3	0.526	18
256	pspB	Phage shock protein B OS=Escherichia coli (strain K12) GN=pspB PE=1 SV=1	PSPB_ECOLI	Cell inner membrane; Single-pass membrane protein.	13	10	0.769231	-3	0.514	13
257	yccS	Inner membrane protein YccS OS=Escherichia coli (strain K12) GN=yccS PE=1 SV=2	YCCS_ECOLI	Cell inner membrane; Multi-pass membrane protein.	13	10	0.769231	-3	0.17	13
258	ybdG	Miniconductance mechanosensitive channel YbdG OS=Escherichia coli (strain K12) GN=ybdG PE=1 SV=1	YBDG_ECOLI	Cell inner membrane {ECO:0000269|PubMed:20616037}; Multi-pass membrane protein {ECO:0000269|PubMed:20616037}.	10	7	0.7	-3	0.224	10
259	appC	Cytochrome bd-II ubiquinol oxidase subunit 1 OS=Escherichia coli (strain K12) GN=appC PE=1 SV=1	APPC_ECOLI	Cell inner membrane {ECO:0000269|PubMed:15919996}; Multi-pass membrane protein {ECO:0000269|PubMed:15919996}.	8	5	0.625	-3	0.142	8
260	araE	Arabinose-proton symporter OS=Escherichia coli (strain K12) GN=araE PE=1 SV=1	ARAE_ECOLI	Cell inner membrane; Multi-pass membrane protein.	5	2	0.4	-3	0.102	5
261	yhjD	Inner membrane protein YhjD OS=Escherichia coli (strain K12) GN=yhjD PE=1 SV=1	YHJD_ECOLI	Cell inner membrane; Multi-pass membrane protein.	5	2	0.4	-3	0.163	5
262	yhaH	Inner membrane protein YhaH OS=Escherichia coli (strain K12) GN=yhaH PE=1 SV=1	YHAH_ECOLI	Cell inner membrane; Multi-pass membrane protein.	4	1	0.25	-3	0.207	4
263	nfrB	Bacteriophage adsorption protein B OS=Escherichia coli (strain K12) GN=nfrB PE=4 SV=1	NFRB_ECOLI	Cell inner membrane {ECO:0000269|PubMed:15919996}; Multi-pass membrane protein {ECO:0000269|PubMed:15919996}.	4	1	0.25	-3	0.062	4
264	kefF	Glutathione-regulated potassium-efflux system ancillary protein KefF OS=Escherichia coli (strain K12) GN=kefF PE=1 SV=1	KEFF_ECOLI	Cell inner membrane {ECO:0000255|HAMAP-Rule:MF_01414}; Peripheral membrane protein {ECO:0000255|HAMAP-Rule:MF_01414}; Cytoplasmic side {ECO:0000255|HAMAP-Rule:MF_01414}.	3	0	0	-3	0.182	3
265	yejB	Inner membrane ABC transporter permease protein YejB OS=Escherichia coli (strain K12) GN=yejB PE=1 SV=1	YEJB_ECOLI	Cell inner membrane; Multi-pass membrane protein.	3	0	0	-3	0.071	3
266	mdtA	Multidrug resistance protein MdtA OS=Escherichia coli (strain K12) GN=mdtA PE=2 SV=2	MDTA_ECOLI	Cell inner membrane {ECO:0000305}; Peripheral membrane protein {ECO:0000305}.	3	0	0	-3	0.055	3
267	mtgA	Biosynthetic peptidoglycan transglycosylase OS=Escherichia coli (strain K12) GN=mtgA PE=1 SV=1	MTGA_ECOLI	Cell inner membrane {ECO:0000255|HAMAP-Rule:MF_00766, ECO:0000269|PubMed:8772200}; Single-pass membrane protein {ECO:0000255|HAMAP-Rule:MF_00766}. Note=Localizes to the cell division site. {ECO:0000269|PubMed:18165305}.	3	0	0	-3	0.083	3
268	sanA	Protein SanA OS=Escherichia coli (strain K12) GN=sanA PE=4 SV=1	SANA_ECOLI	Cell inner membrane; Single-pass membrane protein.	3	0	0	-3	0.222	3
269	narQ	Nitrate/nitrite sensor protein NarQ OS=Escherichia coli (strain K12) GN=narQ PE=3 SV=1	NARQ_ECOLI	Cell inner membrane {ECO:0000269|PubMed:15919996}; Multi-pass membrane protein {ECO:0000269|PubMed:15919996}.	3	0	0	-3	0.087	3
270	fdnI	Formate dehydrogenase, nitrate-inducible, cytochrome b556(Fdn) subunit OS=Escherichia coli (strain K12) GN=fdnI PE=1 SV=1	FDNI_ECOLI	Cell inner membrane {ECO:0000269|PubMed:11884747}; Multi-pass membrane protein {ECO:0000269|PubMed:11884747}.	3	0	0	-3	0.083	3
271	bcsB	Cyclic di-GMP-binding protein OS=Escherichia coli (strain K12) GN=bcsB PE=1 SV=2	BCSB_ECOLI	Cell inner membrane; Single-pass type I membrane protein.	3	0	0	-3	0.039	3
272	fliF	Flagellar M-ring protein OS=Escherichia coli (strain K12) GN=fliF PE=1 SV=3	FLIF_ECOLI	Cell inner membrane {ECO:0000269|PubMed:15919996}; Multi-pass membrane protein {ECO:0000269|PubMed:15919996}. Bacterial flagellum basal body {ECO:0000269|PubMed:15919996}.	37	33	0.891892	-4	0.504	42
273	ytfB	Uncharacterized protein YtfB OS=Escherichia coli (strain K12) GN=ytfB PE=3 SV=2	YTFB_ECOLI	Cell inner membrane {ECO:0000305}; Single-pass membrane protein {ECO:0000305}.	15	11	0.733333	-4	0.316	15
274	oppB	Oligopeptide transport system permease protein OppB OS=Escherichia coli (strain K12) GN=oppB PE=1 SV=1	OPPB_ECOLI	Cell inner membrane; Multi-pass membrane protein.	9	5	0.555556	-4	0.137	9
275	sdhD	Succinate dehydrogenase hydrophobic membrane anchor subunit OS=Escherichia coli (strain K12) GN=sdhD PE=1 SV=1	DHSD_ECOLI	Cell inner membrane {ECO:0000269|PubMed:15919996}; Multi-pass membrane protein {ECO:0000269|PubMed:15919996}.	8	4	0.5	-4	0.174	8
276	minD	Septum site-determining protein MinD OS=Escherichia coli (strain K12) GN=minD PE=1 SV=2	MIND_ECOLI	Cell inner membrane; Peripheral membrane protein.	6	2	0.333333	-4	0.13	6
277	putP	Sodium/proline symporter OS=Escherichia coli (strain K12) GN=putP PE=1 SV=1	PUTP_ECOLI	Cell inner membrane {ECO:0000269|PubMed:16079137}; Multi-pass membrane protein {ECO:0000269|PubMed:16079137}.	6	2	0.333333	-4	0.068	6
278	yhjG	AsmA family protein YhjG OS=Escherichia coli (strain K12) GN=yhjG PE=3 SV=3	YHJG_ECOLI	Cell membrane {ECO:0000305}; Single-pass membrane protein {ECO:0000305}.	5	1	0.2	-4	0.085	5
279	yeaJ	Putative diguanylate cyclase YeaJ OS=Escherichia coli (strain K12) GN=yeaJ PE=1 SV=2	YEAJ_ECOLI	Cell inner membrane {ECO:0000305}; Multi-pass membrane protein {ECO:0000305}.	4	0	0	-4	0.05	4
280	malX	PTS system maltose-specific EIICB component OS=Escherichia coli (strain K12) GN=malX PE=1 SV=3	PTOCB_ECOLI	Cell inner membrane {ECO:0000255|PROSITE-ProRule:PRU00426, ECO:0000269|PubMed:15919996}; Multi-pass membrane protein {ECO:0000255|PROSITE-ProRule:PRU00426, ECO:0000269|PubMed:15919996}.	4	0	0	-4	0.074	4
281	mdlA	Multidrug resistance-like ATP-binding protein MdlA OS=Escherichia coli (strain K12) GN=mdlA PE=3 SV=1	MDLA_ECOLI	Cell inner membrane {ECO:0000269|PubMed:15919996}; Multi-pass membrane protein {ECO:0000255|PROSITE-ProRule:PRU00441, ECO:0000269|PubMed:15919996}.	4	0	0	-4	0.11	4
282	zntB	Zinc transport protein ZntB OS=Escherichia coli (strain K12) GN=zntB PE=1 SV=1	ZNTB_ECOLI	Cell inner membrane; Multi-pass membrane protein.	4	0	0	-4	0.055	4
283	fadD	Long-chain-fatty-acid--CoA ligase OS=Escherichia coli (strain K12) GN=fadD PE=1 SV=1	LCFA_ECOLI	Membrane {ECO:0000250}; Peripheral membrane protein {ECO:0000250}. Note=Partially membrane-associated. {ECO:0000250}.	4	0	0	-4	0.107	4
284	sapF	Putrescine export system ATP-binding protein SapF OS=Escherichia coli (strain K12) GN=sapF PE=1 SV=1	SAPF_ECOLI	Cell inner membrane {ECO:0000305}; Peripheral membrane protein {ECO:0000305}.	4	0	0	-4	0.075	4
285	yejE	Inner membrane ABC transporter permease protein YejE OS=Escherichia coli (strain K12) GN=yejE PE=1 SV=1	YEJE_ECOLI	Cell inner membrane; Multi-pass membrane protein.	4	0	0	-4	0.114	4
286	pgsA	CDP-diacylglycerol--glycerol-3-phosphate 3-phosphatidyltransferase OS=Escherichia coli (strain K12) GN=pgsA PE=1 SV=2	PGSA_ECOLI	Cell inner membrane; Multi-pass membrane protein.	4	0	0	-4	0.137	4
287	proW	Glycine betaine/proline betaine transport system permease protein ProW OS=Escherichia coli (strain K12) GN=proW PE=1 SV=1	PROW_ECOLI	Cell inner membrane {ECO:0000269|PubMed:15919996}; Multi-pass membrane protein {ECO:0000255}.	4	0	0	-4	0.096	4
288	dppD	Dipeptide transport ATP-binding protein DppD OS=Escherichia coli (strain K12) GN=dppD PE=3 SV=1	DPPD_ECOLI	Cell inner membrane {ECO:0000305}; Peripheral membrane protein {ECO:0000305}.	4	0	0	-4	0.095	4
289	parC	DNA topoisomerase 4 subunit A OS=Escherichia coli (strain K12) GN=parC PE=1 SV=1	PARC_ECOLI	Cell membrane; Peripheral membrane protein.	4	0	0	-4	0.125	4
290	sdhC	Succinate dehydrogenase cytochrome b556 subunit OS=Escherichia coli (strain K12) GN=sdhC PE=1 SV=1	DHSC_ECOLI	Cell inner membrane; Multi-pass membrane protein.	17	12	0.705882	-5	0.194	17
291	glnQ	Glutamine transport ATP-binding protein GlnQ OS=Escherichia coli (strain K12) GN=glnQ PE=1 SV=1	GLNQ_ECOLI	Cell inner membrane {ECO:0000269|PubMed:16079137}; Peripheral membrane protein {ECO:0000269|PubMed:16079137}.	12	7	0.583333	-5	0.462	12
292	feoB	Fe(2+) transporter FeoB OS=Escherichia coli (strain K12) GN=feoB PE=1 SV=1	FEOB_ECOLI	Cell inner membrane {ECO:0000269|PubMed:15919996}; Multi-pass membrane protein.	12	7	0.583333	-5	0.132	12
293	baeS	Signal transduction histidine-protein kinase BaeS OS=Escherichia coli (strain K12) GN=baeS PE=1 SV=2	BAES_ECOLI	Cell inner membrane {ECO:0000269|PubMed:15919996}; Multi-pass membrane protein {ECO:0000269|PubMed:15919996}.	10	5	0.5	-5	0.195	10
294	yggT	Uncharacterized protein YggT OS=Escherichia coli (strain K12) GN=yggT PE=3 SV=1	YGGT_ECOLI	Cell membrane {ECO:0000305}; Multi-pass membrane protein {ECO:0000305}.	10	5	0.5	-5	0.106	10
295	ydjZ	TVP38/TMEM64 family inner membrane protein YdjZ OS=Escherichia coli (strain K12) GN=ydjZ PE=1 SV=1	YDJZ_ECOLI	Cell inner membrane; Multi-pass membrane protein.	7	2	0.285714	-5	0.26	7
296	fetA	Probable iron export ATP-binding protein FetA OS=Escherichia coli (strain K12) GN=fetA PE=1 SV=1	FETA_ECOLI	Cell inner membrane {ECO:0000250}; Peripheral membrane protein {ECO:0000250}.	5	0	0	-5	0.236	5
297	btsS	Sensor histidine kinase BtsS OS=Escherichia coli (strain K12) GN=btsS PE=1 SV=1	BTSS_ECOLI	Cell inner membrane {ECO:0000269|PubMed:15919996}; Multi-pass membrane protein {ECO:0000255}.	5	0	0	-5	0.05	5
298	flk	Flagellar regulator flk OS=Escherichia coli (strain K12) GN=flk PE=3 SV=2 0	FLK_ECOLI	Cell inner membrane {ECO:0000305}; Single-pass membrane protein {ECO:0000305}.	5	0	0	-5	0.082	5
299	yegH	UPF0053 protein YegH OS=Escherichia coli (strain K12) GN=yegH PE=3 SV=2	YEGH_ECOLI	Cell membrane {ECO:0000305}; Multi-pass membrane protein {ECO:0000305}.	12	6	0.5	-6	0.118	12
300	plsC	1-acyl-sn-glycerol-3-phosphate acyltransferase OS=Escherichia coli (strain K12) GN=plsC PE=1 SV=1	PLSC_ECOLI	Cell inner membrane {ECO:0000269|PubMed:1557036}; Peripheral membrane protein {ECO:0000269|PubMed:1557036}.	12	6	0.5	-6	0.322	12
301	oppC	Oligopeptide transport system permease protein OppC OS=Escherichia coli (strain K12) GN=oppC PE=1 SV=1	OPPC_ECOLI	Cell inner membrane; Multi-pass membrane protein.	9	3	0.333333	-6	0.083	9
302	yebO	Uncharacterized protein YebO OS=Escherichia coli (strain K12) GN=yebO PE=4 SV=1	YEBO_ECOLI	Cell membrane {ECO:0000305}; Single-pass membrane protein {ECO:0000305}.	7	1	0.142857	-6	0.411	7
303	macB	Macrolide export ATP-binding/permease protein MacB OS=Escherichia coli (strain K12) GN=macB PE=1 SV=1	MACB_ECOLI	Cell inner membrane {ECO:0000255|HAMAP-Rule:MF_01720, ECO:0000269|PubMed:11544226, ECO:0000269|PubMed:17214741}; Multi-pass membrane protein {ECO:0000255|HAMAP-Rule:MF_01720, ECO:0000269|PubMed:11544226, ECO:0000269|PubMed:17214741}.	7	1	0.142857	-6	0.127	7
304	secA	Protein translocase subunit SecA OS=Escherichia coli (strain K12) GN=secA PE=1 SV=2	SECA_ECOLI	Cell inner membrane; Peripheral membrane protein; Cytoplasmic side. Cytoplasm. Note=Distribution is 50-50.	6	0	0	-6	0.15	6
305	rseA	Anti-sigma-E factor RseA OS=Escherichia coli (strain K12) GN=rseA PE=1 SV=1	RSEA_ECOLI	Cell inner membrane {ECO:0000269|PubMed:11777003, ECO:0000269|PubMed:12183369, ECO:0000269|PubMed:9159522, ECO:0000269|PubMed:9159523}; Single-pass type II membrane protein {ECO:0000269|PubMed:11777003, ECO:0000269|PubMed:12183369, ECO:0000269|PubMed:9159522, ECO:0000269|PubMed:9159523}. Note=Following cleavage by DegS the large fragment of the protein is still in the inner membrane and retains i…	6	0	0	-6	0.162	6
306	glrK	Sensor histidine kinase GlrK OS=Escherichia coli (strain K12) GN=glrK PE=1 SV=3	GLRK_ECOLI	Cell inner membrane; Multi-pass membrane protein.	6	0	0	-6	0.171	6
307	fdoI	Formate dehydrogenase, cytochrome b556(fdo) subunit OS=Escherichia coli (strain K12) GN=fdoI PE=1 SV=1	FDOI_ECOLI	Cell inner membrane; Multi-pass membrane protein.	6	0	0	-6	0.28	6
308	yedI	Inner membrane protein YedI OS=Escherichia coli (strain K12) GN=yedI PE=1 SV=2	YEDI_ECOLI	Cell inner membrane; Multi-pass membrane protein.	6	0	0	-6	0.102	6
309	fdnH	Formate dehydrogenase, nitrate-inducible, iron-sulfur subunit OS=Escherichia coli (strain K12) GN=fdnH PE=1 SV=1	FDNH_ECOLI	Cell inner membrane {ECO:0000269|PubMed:11884747}; Single-pass membrane protein {ECO:0000269|PubMed:11884747}.	6	0	0	-6	0.248	6
310	perM	Putative permease PerM OS=Escherichia coli (strain K12) GN=perM PE=3 SV=1	PERM_ECOLI	Cell membrane {ECO:0000305}; Multi-pass membrane protein {ECO:0000305}.	6	0	0	-6	0.105	6
311	sapD	Putrescine export system ATP-binding protein SapD OS=Escherichia coli (strain K12) GN=sapD PE=1 SV=1	SAPD_ECOLI	Cell inner membrane {ECO:0000305}; Peripheral membrane protein {ECO:0000305}.	6	0	0	-6	0.088	6
312	rseP	Regulator of sigma-E protease RseP OS=Escherichia coli (strain K12) GN=rseP PE=1 SV=1	RSEP_ECOLI	Cell inner membrane {ECO:0000269|PubMed:11689431, ECO:0000269|PubMed:11750129, ECO:0000269|PubMed:11867724, ECO:0000269|PubMed:15919996}; Multi-pass membrane protein {ECO:0000269|PubMed:11689431, ECO:0000269|PubMed:11750129, ECO:0000269|PubMed:11867724, ECO:0000269|PubMed:15919996}.	31	24	0.774194	-7	0.362	31
313	bcsG	Protein BcsG homolog OS=Escherichia coli (strain K12) GN=bcsG PE=4 SV=1	BCSG_ECOLI	Cell membrane {ECO:0000305}; Multi-pass membrane protein {ECO:0000305}.	17	10	0.588235	-7	0.231	17
314	lpxL	Lipid A biosynthesis lauroyltransferase OS=Escherichia coli (strain K12) GN=lpxL PE=1 SV=1	LPXL_ECOLI	Cell inner membrane {ECO:0000255|HAMAP-Rule:MF_01942, ECO:0000269|PubMed:1846149, ECO:0000269|PubMed:18656959, ECO:0000269|PubMed:8662613}; Single-pass membrane protein {ECO:0000255|HAMAP-Rule:MF_01942}.	10	3	0.3	-7	0.288	10
315	modC	Molybdenum import ATP-binding protein ModC OS=Escherichia coli (strain K12) GN=modC PE=3 SV=4	MODC_ECOLI	Cell inner membrane; Peripheral membrane protein.	10	3	0.3	-7	0.151	10
316	lolC	Lipoprotein-releasing system transmembrane protein LolC OS=Escherichia coli (strain K12) GN=lolC PE=1 SV=1	LOLC_ECOLI	Cell inner membrane; Multi-pass membrane protein.	10	3	0.3	-7	0.165	10
317	flhA	Flagellar biosynthesis protein FlhA OS=Escherichia coli (strain K12) GN=flhA PE=3 SV=1	FLHA_ECOLI	Cell inner membrane {ECO:0000269|PubMed:15919996}; Multi-pass membrane protein {ECO:0000269|PubMed:15919996}.	8	1	0.125	-7	0.113	8
318	elyC	Envelope biogenesis factor ElyC OS=Escherichia coli (strain K12) GN=elyC PE=4 SV=1	ELYC_ECOLI	Cell inner membrane {ECO:0000305}; Multi-pass membrane protein {ECO:0000305}.	7	0	0	-7	0.189	7
319	ydhJ	Uncharacterized protein YdhJ OS=Escherichia coli (strain K12) GN=ydhJ PE=3 SV=2	YDHJ_ECOLI	Membrane {ECO:0000305}; Single-pass membrane protein {ECO:0000305}.	7	0	0	-7	0.175	7
320	lapB	Lipopolysaccharide assembly protein B OS=Escherichia coli (strain K12) GN=lapB PE=1 SV=1	LAPB_ECOLI	Cell inner membrane {ECO:0000255|HAMAP-Rule:MF_00994, ECO:0000269|PubMed:24187084, ECO:0000269|PubMed:24722986}; Single-pass membrane protein {ECO:0000255|HAMAP-Rule:MF_00994, ECO:0000269|PubMed:24187084}; Cytoplasmic side {ECO:0000255|HAMAP-Rule:MF_00994, ECO:0000269|PubMed:24187084}.	12	4	0.333333	-8	0.195	12
321	lpxM	Lipid A biosynthesis myristoyltransferase OS=Escherichia coli (strain K12) GN=lpxM PE=1 SV=1	LPXM_ECOLI	Cell inner membrane {ECO:0000255|HAMAP-Rule:MF_01944, ECO:0000269|PubMed:9099672}; Single-pass membrane protein {ECO:0000255|HAMAP-Rule:MF_01944}.	8	0	0	-8	0.195	8
322	phoQ	Sensor protein PhoQ OS=Escherichia coli (strain K12) GN=phoQ PE=1 SV=1	PHOQ_ECOLI	Cell inner membrane {ECO:0000269|PubMed:15919996}; Multi-pass membrane protein {ECO:0000269|PubMed:15919996}.	8	0	0	-8	0.136	8
323	dsbB	Disulfide bond formation protein B OS=Escherichia coli (strain K12) GN=dsbB PE=1 SV=1	DSBB_ECOLI	Cell inner membrane {ECO:0000269|PubMed:7957076, ECO:0000269|PubMed:8430071}; Multi-pass membrane protein {ECO:0000269|PubMed:7957076, ECO:0000269|PubMed:8430071}.	16	7	0.4375	-9	0.386	16
324	ftsE	Cell division ATP-binding protein FtsE OS=Escherichia coli (strain K12) GN=ftsE PE=1 SV=1	FTSE_ECOLI	Cell inner membrane {ECO:0000269|PubMed:10048040, ECO:0000269|PubMed:3323846}; Peripheral membrane protein {ECO:0000269|PubMed:10048040}; Cytoplasmic side {ECO:0000305}. Note=Associated with the membrane through an interaction with FtsX (PubMed:10048040). Localizes to the septal ring at the later stages of cell growth and remains there until division is complete (PubMed:14729705). This localizati…	11	2	0.181818	-9	0.329	11
325	rtn	Protein Rtn OS=Escherichia coli (strain K12) GN=rtn PE=2 SV=1 0	RTN_ECOLI	Cell inner membrane {ECO:0000269|PubMed:15919996}; Multi-pass membrane protein {ECO:0000269|PubMed:15919996}.	10	1	0.1	-9	0.216	10
326	rbsA	Ribose import ATP-binding protein RbsA OS=Escherichia coli (strain K12) GN=rbsA PE=1 SV=1	RBSA_ECOLI	Cell inner membrane {ECO:0000255|HAMAP-Rule:MF_01716, ECO:0000305|PubMed:25533465}; Peripheral membrane protein {ECO:0000255|HAMAP-Rule:MF_01716, ECO:0000305|PubMed:25533465}.	10	1	0.1	-9	0.22	10
327	motA	Motility protein A OS=Escherichia coli (strain K12) GN=motA PE=1 SV=1	MOTA_ECOLI	Cell inner membrane; Multi-pass membrane protein.	9	0	0	-9	0.169	9
328	cdh	CDP-diacylglycerol pyrophosphatase OS=Escherichia coli (strain K12) GN=cdh PE=3 SV=1 1	CDH_ECOLI	Cell inner membrane; Single-pass membrane protein.	9	0	0	-9	0.271	9
329	yfjD	UPF0053 inner membrane protein YfjD OS=Escherichia coli (strain K12) GN=yfjD PE=1 SV=5	YFJD_ECOLI	Cell inner membrane; Multi-pass membrane protein.	9	0	0	-9	0.119	9
330	ygiM	Uncharacterized protein YgiM OS=Escherichia coli (strain K12) GN=ygiM PE=3 SV=1	YGIM_ECOLI	Membrane {ECO:0000305}; Single-pass membrane protein {ECO:0000305}.	57	47	0.824561	-10	0.626	57
331	treB	PTS system trehalose-specific EIIBC component OS=Escherichia coli (strain K12) GN=treB PE=1 SV=4	PTTBC_ECOLI	Cell inner membrane {ECO:0000255|PROSITE-ProRule:PRU00426, ECO:0000305|PubMed:2160944}; Multi-pass membrane protein {ECO:0000255|PROSITE-ProRule:PRU00426}.	46	36	0.782609	-10	0.503	47
332	rsxC	Electron transport complex subunit RsxC OS=Escherichia coli (strain K12) GN=rsxC PE=1 SV=1	RSXC_ECOLI	Cell inner membrane {ECO:0000255|HAMAP-Rule:MF_00461}; Peripheral membrane protein {ECO:0000255|HAMAP-Rule:MF_00461}.	15	5	0.333333	-10	0.305	15
333	lolD	Lipoprotein-releasing system ATP-binding protein LolD OS=Escherichia coli (strain K12) GN=lolD PE=1 SV=2	LOLD_ECOLI	Cell inner membrane; Peripheral membrane protein.	15	5	0.333333	-10	0.378	15
334	yedQ	Probable diguanylate cyclase YedQ OS=Escherichia coli (strain K12) GN=yedQ PE=2 SV=2	YEDQ_ECOLI	Cell inner membrane {ECO:0000305}; Multi-pass membrane protein {ECO:0000305}.	11	1	0.0909091	-10	0.254	11
335	fliM	Flagellar motor switch protein FliM OS=Escherichia coli (strain K12) GN=fliM PE=1 SV=1	FLIM_ECOLI	Cell inner membrane; Peripheral membrane protein. Bacterial flagellum basal body.	11	1	0.0909091	-10	0.287	11
336	glpB	Anaerobic glycerol-3-phosphate dehydrogenase subunit B OS=Escherichia coli (strain K12) GN=glpB PE=1 SV=1	GLPB_ECOLI	Cell inner membrane; Peripheral membrane protein. Note=Loosely bound to the cytoplasmic membrane often occurring in vesicles associated with fumarate reductase.	10	0	0	-10	0.277	10
337	ytfL	UPF0053 inner membrane protein YtfL OS=Escherichia coli (strain K12) GN=ytfL PE=1 SV=1	YTFL_ECOLI	Cell inner membrane; Multi-pass membrane protein.	10	0	0	-10	0.251	10
338	ubiB	Probable protein kinase UbiB OS=Escherichia coli (strain K12) GN=ubiB PE=1 SV=1	UBIB_ECOLI	Cell inner membrane {ECO:0000255|HAMAP-Rule:MF_00414, ECO:0000269|PubMed:15919996}; Multi-pass membrane protein {ECO:0000255|HAMAP-Rule:MF_00414, ECO:0000269|PubMed:15919996}.	24	13	0.541667	-11	0.291	24
339	htpX	Protease HtpX OS=Escherichia coli (strain K12) GN=htpX PE=1 SV=1	HTPX_ECOLI	Cell inner membrane {ECO:0000269|PubMed:12081643}; Multi-pass membrane protein {ECO:0000269|PubMed:12081643}. Note=Bioinformatics programs predict 4 transmembrane helices, however PhoA and Bla fusions as well as other experiments only confirm the first 2. {ECO:0000269|PubMed:12081643}.	14	3	0.214286	-11	0.201	14
340	tap	Methyl-accepting chemotaxis protein IV OS=Escherichia coli (strain K12) GN=tap PE=1 SV=2 0	MCP4_ECOLI	Cell inner membrane {ECO:0000269|PubMed:22380631}; Multi-pass membrane protein {ECO:0000269|PubMed:22380631}. Note=Found predominantly at cell poles.	13	2	0.153846	-11	0.212	13
341	ypfJ	Uncharacterized protein YpfJ OS=Escherichia coli (strain K12) GN=ypfJ PE=4 SV=1	YPFJ_ECOLI	Membrane {ECO:0000305}; Single-pass membrane protein {ECO:0000305}.	11	0	0	-11	0.251	11
342	gcd	Quinoprotein glucose dehydrogenase OS=Escherichia coli (strain K12) GN=gcd PE=1 SV=3 1	DHG_ECOLI	Cell inner membrane {ECO:0000269|PubMed:15919996, ECO:0000269|PubMed:16079137}; Multi-pass membrane protein {ECO:0000269|PubMed:15919996, ECO:0000269|PubMed:16079137}; Periplasmic side {ECO:0000269|PubMed:15919996, ECO:0000269|PubMed:16079137}.	47	34	0.723404	-13	0.377	47
343	manZ	PTS system mannose-specific EIID component OS=Escherichia coli (strain K12) GN=manZ PE=1 SV=2	PTND_ECOLI	Cell inner membrane {ECO:0000305|PubMed:8774730}; Single-pass membrane protein {ECO:0000305|PubMed:8774730}.	25	12	0.48	-13	0.463	25
344	elaB	Protein ElaB OS=Escherichia coli (strain K12) GN=elaB PE=1 SV=1	ELAB_ECOLI	Cell inner membrane {ECO:0000305}; Single-pass membrane protein {ECO:0000305}.	22	9	0.409091	-13	0.703	22
345	tatB	Sec-independent protein translocase protein TatB OS=Escherichia coli (strain K12) GN=tatB PE=1 SV=1	TATB_ECOLI	Cell inner membrane {ECO:0000255|HAMAP-Rule:MF_00237, ECO:0000269|PubMed:11591389, ECO:0000269|PubMed:15225613, ECO:0000269|PubMed:20169075}; Single-pass membrane protein {ECO:0000255|HAMAP-Rule:MF_00237, ECO:0000269|PubMed:11591389, ECO:0000269|PubMed:15225613, ECO:0000269|PubMed:20169075}. Note=Localizes at the cell poles.	17	4	0.235294	-13	0.702	17
346	ygaP	Inner membrane protein YgaP OS=Escherichia coli (strain K12) GN=ygaP PE=1 SV=1	YGAP_ECOLI	Cell inner membrane; Multi-pass membrane protein.	15	2	0.133333	-13	0.414	15
347	rcsC	Sensor histidine kinase RcsC OS=Escherichia coli (strain K12) GN=rcsC PE=1 SV=1	RCSC_ECOLI	Cell inner membrane {ECO:0000255|HAMAP-Rule:MF_00979, ECO:0000269|PubMed:15919996, ECO:0000269|PubMed:2404948}; Multi-pass membrane protein {ECO:0000255|HAMAP-Rule:MF_00979, ECO:0000269|PubMed:15919996, ECO:0000269|PubMed:2404948}.	13	0	0	-13	0.143	13
348	nuoB	NADH-quinone oxidoreductase subunit B OS=Escherichia coli (strain K12) GN=nuoB PE=1 SV=1	NUOB_ECOLI	Cell inner membrane; Peripheral membrane protein; Cytoplasmic side.	22	8	0.363636	-14	0.286	22
349	tolA	Protein TolA OS=Escherichia coli (strain K12) GN=tolA PE=1 SV=1	TOLA_ECOLI	Cell inner membrane; Single-pass type II membrane protein.	19	5	0.263158	-14	0.287	19
350	fliG	Flagellar motor switch protein FliG OS=Escherichia coli (strain K12) GN=fliG PE=1 SV=1	FLIG_ECOLI	Cell inner membrane; Peripheral membrane protein; Cytoplasmic side. Bacterial flagellum basal body.	14	0	0	-14	0.196	14
351	lolE	Lipoprotein-releasing system transmembrane protein LolE OS=Escherichia coli (strain K12) GN=lolE PE=1 SV=3	LOLE_ECOLI	Cell inner membrane; Multi-pass membrane protein.	20	5	0.25	-15	0.258	20
352	barA	Signal transduction histidine-protein kinase BarA OS=Escherichia coli (strain K12) GN=barA PE=1 SV=1	BARA_ECOLI	Cell inner membrane {ECO:0000269|PubMed:15919996}; Multi-pass membrane protein {ECO:0000269|PubMed:15919996}.	20	5	0.25	-15	0.17	20
353	yagU	Inner membrane protein YagU OS=Escherichia coli (strain K12) GN=yagU PE=1 SV=1	YAGU_ECOLI	Cell inner membrane {ECO:0000269|PubMed:16079137}; Multi-pass membrane protein {ECO:0000269|PubMed:16079137}.	19	4	0.210526	-15	0.275	19
354	degP	Periplasmic serine endoprotease DegP OS=Escherichia coli (strain K12) GN=degP PE=1 SV=1	DEGP_ECOLI	Cell inner membrane {ECO:0000269|PubMed:9083020}; Peripheral membrane protein {ECO:0000269|PubMed:9083020}; Cytoplasmic side {ECO:0000269|PubMed:9083020}.	23	7	0.304348	-16	0.35	23
355	ybjT	Putative NAD(P)-binding protein YbjT OS=Escherichia coli (strain K12) GN=ybjT PE=3 SV=2	YBJT_ECOLI	Cell inner membrane {ECO:0000255}; Single-pass membrane protein {ECO:0000255}.	16	0	0	-16	0.317	16
356	hyaA	Hydrogenase-1 small chain OS=Escherichia coli (strain K12) GN=hyaA PE=1 SV=1	MBHS_ECOLI	Cell inner membrane; Single-pass type I membrane protein; Periplasmic side.	27	10	0.37037	-17	0.589	27
357	yfdH	Prophage bactoprenol glucosyl transferase homolog OS=Escherichia coli (strain K12) GN=yfdH PE=1 SV=1	GTRB_ECOLI	Cell inner membrane; Multi-pass membrane protein.	17	0	0	-17	0.307	17
358	tamB	Translocation and assembly module subunit TamB OS=Escherichia coli (strain K12) GN=tamB PE=1 SV=2	TAMB_ECOLI	Cell inner membrane {ECO:0000305|PubMed:22466966}; Single-pass membrane protein {ECO:0000305|PubMed:22466966}.	17	0	0	-17	0.114	17
359	trkA	Trk system potassium uptake protein TrkA OS=Escherichia coli (strain K12) GN=trkA PE=1 SV=1	TRKA_ECOLI	Cell inner membrane {ECO:0000269|PubMed:2674131}; Peripheral membrane protein {ECO:0000269|PubMed:2674131}; Cytoplasmic side {ECO:0000269|PubMed:2674131}. Note=Peripherally bound to the inner side of the inner membrane via the TrkG and TrkH proteins.	17	0	0	-17	0.373	17
360	glpA	Anaerobic glycerol-3-phosphate dehydrogenase subunit A OS=Escherichia coli (strain K12) GN=glpA PE=1 SV=1	GLPA_ECOLI	Cell inner membrane; Peripheral membrane protein. Note=Loosely bound to the cytoplasmic membrane often occurring in vesicles associated with fumarate reductase.	17	0	0	-17	0.303	17
361	sppA	Protease 4 OS=Escherichia coli (strain K12) GN=sppA PE=1 SV=2	SPPA_ECOLI	Cell inner membrane {ECO:0000269|PubMed:18476724, ECO:0000269|PubMed:3522590}; Single-pass membrane protein {ECO:0000269|PubMed:18476724, ECO:0000269|PubMed:3522590}.	43	25	0.581395	-18	0.382	43
362	ftsA	Cell division protein FtsA OS=Escherichia coli (strain K12) GN=ftsA PE=1 SV=1	FTSA_ECOLI	Cell inner membrane {ECO:0000269|PubMed:15752196, ECO:0000269|PubMed:2203741}; Peripheral membrane protein {ECO:0000269|PubMed:15752196, ECO:0000269|PubMed:2203741}; Cytoplasmic side {ECO:0000269|PubMed:15752196, ECO:0000269|PubMed:2203741}. Note=Localizes to the Z ring in an FtsZ-dependent manner (PubMed:8955398, PubMed:8917533, PubMed:9495771). Targeted to the membrane through a conserved C-ter…	22	4	0.181818	-18	0.381	22
363	yqjD	Uncharacterized protein YqjD OS=Escherichia coli (strain K12) GN=yqjD PE=1 SV=1	YQJD_ECOLI	Cell inner membrane {ECO:0000269|PubMed:22380631, ECO:0000269|PubMed:22661687}; Single-pass membrane protein {ECO:0000269|PubMed:22380631, ECO:0000269|PubMed:22661687}. Note=Predominantly localized to 1 cell pole in stationary phase, with a few smaller foci elsewhere in the cell; polar localization depends on the minCDE operon.	21	2	0.0952381	-19	0.752	21
364	gsiA	Glutathione import ATP-binding protein GsiA OS=Escherichia coli (strain K12) GN=gsiA PE=1 SV=3	GSIA_ECOLI	Cell inner membrane {ECO:0000250}; Peripheral membrane protein {ECO:0000250}.	19	0	0	-19	0.177	19
365	tatA	Sec-independent protein translocase protein TatA OS=Escherichia coli (strain K12) GN=tatA PE=1 SV=1	TATA_ECOLI	Cell inner membrane {ECO:0000255|HAMAP-Rule:MF_00236, ECO:0000269|PubMed:11591389, ECO:0000269|PubMed:15225613, ECO:0000269|PubMed:20169075}; Single-pass membrane protein {ECO:0000255|HAMAP-Rule:MF_00236, ECO:0000269|PubMed:11591389, ECO:0000269|PubMed:15225613, ECO:0000269|PubMed:20169075}; Cytoplasmic side {ECO:0000269|PubMed:11591389, ECO:0000269|PubMed:15225613, ECO:0000269|PubMed:20169075}. …	37	17	0.459459	-20	0.539	37
366	ynfE	Putative dimethyl sulfoxide reductase chain YnfE OS=Escherichia coli (strain K12) GN=ynfE PE=1 SV=1	YNFE_ECOLI	Cell membrane {ECO:0000250}; Peripheral membrane protein {ECO:0000250}; Cytoplasmic side {ECO:0000250}.	36	16	0.444444	-20	0.27	36
367	narX	Nitrate/nitrite sensor protein NarX OS=Escherichia coli (strain K12) GN=narX PE=1 SV=1	NARX_ECOLI	Cell inner membrane {ECO:0000269|PubMed:15919996}; Multi-pass membrane protein {ECO:0000269|PubMed:15919996}.	30	10	0.333333	-20	0.334	30
368	rstB	Sensor protein RstB OS=Escherichia coli (strain K12) GN=rstB PE=1 SV=2	RSTB_ECOLI	Cell inner membrane; Multi-pass membrane protein.	20	0	0	-20	0.372	20
369	trg	Methyl-accepting chemotaxis protein III OS=Escherichia coli (strain K12) GN=trg PE=1 SV=3 0	MCP3_ECOLI	Cell inner membrane {ECO:0000269|PubMed:15919996, ECO:0000269|PubMed:22380631}; Multi-pass membrane protein {ECO:0000269|PubMed:15919996, ECO:0000269|PubMed:22380631}. Note=Found predominantly at cell poles.	20	0	0	-20	0.275	20
370	pstB	Phosphate import ATP-binding protein PstB OS=Escherichia coli (strain K12) GN=pstB PE=1 SV=2	PSTB_ECOLI	Cell inner membrane; Peripheral membrane protein.	20	0	0	-20	0.432	20
371	ynfF	Probable dimethyl sulfoxide reductase chain YnfF OS=Escherichia coli (strain K12) GN=ynfF PE=1 SV=4	YNFF_ECOLI	Cell membrane {ECO:0000250}; Peripheral membrane protein {ECO:0000250}; Cytoplasmic side {ECO:0000250}.	48	27	0.5625	-21	0.383	48
372	atpB	ATP synthase subunit a OS=Escherichia coli (strain K12) GN=atpB PE=1 SV=1	ATP6_ECOLI	Cell inner membrane {ECO:0000255|HAMAP-Rule:MF_01393, ECO:0000269|PubMed:15919996}; Multi-pass membrane protein {ECO:0000255|HAMAP-Rule:MF_01393, ECO:0000269|PubMed:15919996}.	30	9	0.3	-21	0.221	30
373	mscS	Small-conductance mechanosensitive channel OS=Escherichia coli (strain K12) GN=mscS PE=1 SV=1	MSCS_ECOLI	Cell inner membrane {ECO:0000269|PubMed:10202137, ECO:0000269|PubMed:12551944, ECO:0000269|PubMed:16079137, ECO:0000269|PubMed:23012406, ECO:0000269|PubMed:23074248, ECO:0000269|PubMed:2436228, ECO:0000269|PubMed:7595939}; Multi-pass membrane protein {ECO:0000269|PubMed:12446901, ECO:0000269|PubMed:16079137, ECO:0000269|PubMed:23012406, ECO:0000269|PubMed:23339071, ECO:0000269|PubMed:26551077}.	29	8	0.275862	-21	0.416	29
374	waaU	Lipopolysaccharide 1,2-N-acetylglucosaminetransferase OS=Escherichia coli (strain K12) GN=waaU PE=4 SV=2	WAAU_ECOLI	Membrane; Peripheral membrane protein.	21	0	0	-21	0.401	21
375	mlaF	Probable phospholipid import ATP-binding protein MlaF OS=Escherichia coli (strain K12) GN=mlaF PE=1 SV=1	MLAF_ECOLI	Cell inner membrane {ECO:0000305|PubMed:19383799}; Peripheral membrane protein {ECO:0000305|PubMed:19383799}; Cytoplasmic side {ECO:0000305|PubMed:19383799}.	21	0	0	-21	0.375	21
376	mscL	Large-conductance mechanosensitive channel OS=Escherichia coli (strain K12) GN=mscL PE=1 SV=1	MSCL_ECOLI	Cell inner membrane {ECO:0000255|HAMAP-Rule:MF_00115, ECO:0000269|PubMed:15919996, ECO:0000269|PubMed:23416054, ECO:0000269|PubMed:7511799, ECO:0000269|PubMed:8890153, ECO:0000269|PubMed:9632260, ECO:0000305|PubMed:21151884, ECO:0000305|PubMed:23875651}; Multi-pass membrane protein {ECO:0000255|HAMAP-Rule:MF_00115, ECO:0000269|PubMed:15919996, ECO:0000269|PubMed:8890153}.	22	0	0	-22	0.551	22
377	kdpD	Sensor protein KdpD OS=Escherichia coli (strain K12) GN=kdpD PE=1 SV=2	KDPD_ECOLI	Cell inner membrane {ECO:0000269|PubMed:1532388}; Multi-pass membrane protein {ECO:0000269|PubMed:1532388}.	30	6	0.2	-24	0.219	30
378	copA	Copper-exporting P-type ATPase A OS=Escherichia coli (strain K12) GN=copA PE=1 SV=4	COPA_ECOLI	Cell membrane {ECO:0000305}; Multi-pass membrane protein {ECO:0000305}.	27	3	0.111111	-24	0.245	27
379	lepB	Signal peptidase I OS=Escherichia coli (strain K12) GN=lepB PE=1 SV=2	LEP_ECOLI	Cell inner membrane {ECO:0000269|PubMed:21778229}; Multi-pass membrane protein {ECO:0000269|PubMed:21778229}.	34	9	0.264706	-25	0.426	34
380	metN	Methionine import ATP-binding protein MetN OS=Escherichia coli (strain K12) GN=metN PE=1 SV=4	METN_ECOLI	Cell inner membrane {ECO:0000255|HAMAP-Rule:MF_01719}; Peripheral membrane protein {ECO:0000255|HAMAP-Rule:MF_01719}.	25	0	0	-25	0.574	25
381	nuoI	NADH-quinone oxidoreductase subunit I OS=Escherichia coli (strain K12) GN=nuoI PE=1 SV=1	NUOI_ECOLI	Cell inner membrane {ECO:0000305}; Peripheral membrane protein {ECO:0000305}.	33	7	0.212121	-26	0.661	33
382	oppD	Oligopeptide transport ATP-binding protein OppD OS=Escherichia coli (strain K12) GN=oppD PE=3 SV=2	OPPD_ECOLI	Cell inner membrane; Peripheral membrane protein.	28	1	0.0357143	-27	0.579	28
383	fdoH	Formate dehydrogenase-O iron-sulfur subunit OS=Escherichia coli (strain K12) GN=fdoH PE=1 SV=1	FDOH_ECOLI	Cell membrane; Single-pass membrane protein.	27	0	0	-27	0.407	27
384	mdoH	Glucans biosynthesis glucosyltransferase H OS=Escherichia coli (strain K12) GN=mdoH PE=1 SV=1	OPGH_ECOLI	Cell inner membrane; Multi-pass membrane protein.	62	33	0.532258	-29	0.344	62
385	zntA	Zinc/cadmium/lead-transporting P-type ATPase OS=Escherichia coli (strain K12) GN=zntA PE=1 SV=1	ZNTA_ECOLI	Cell inner membrane {ECO:0000269|PubMed:10660539, ECO:0000269|PubMed:15919996, ECO:0000269|PubMed:16411752, ECO:0000269|PubMed:16890908}; Multi-pass membrane protein {ECO:0000255}.	55	25	0.454545	-30	0.41	55
386	mrcA	Penicillin-binding protein 1A OS=Escherichia coli (strain K12) GN=mrcA PE=1 SV=1	PBPA_ECOLI	Cell inner membrane {ECO:0000269|PubMed:7006606}; Single-pass type II membrane protein {ECO:0000255}.	33	3	0.0909091	-30	0.359	33
387	pyrD	Dihydroorotate dehydrogenase (quinone) OS=Escherichia coli (strain K12) GN=pyrD PE=1 SV=1	PYRD_ECOLI	Cell membrane; Peripheral membrane protein.	31	0	0	-31	0.455	31
388	psd	Phosphatidylserine decarboxylase proenzyme OS=Escherichia coli (strain K12) GN=psd PE=1 SV=1 1	PSD_ECOLI	Cell membrane {ECO:0000255|HAMAP-Rule:MF_00662, ECO:0000269|PubMed:4598120}; Peripheral membrane protein {ECO:0000255|HAMAP-Rule:MF_00662, ECO:0000269|PubMed:4598120}.	35	3	0.0857143	-32	0.689	35
389	hyaB	Hydrogenase-1 large chain OS=Escherichia coli (strain K12) GN=hyaB PE=1 SV=1	MBHL_ECOLI	Cell membrane; Peripheral membrane protein.	41	8	0.195122	-33	0.464	41
390	aas	Bifunctional protein Aas OS=Escherichia coli (strain K12) GN=aas PE=1 SV=2 1	AAS_ECOLI	Cell inner membrane; Multi-pass membrane protein.	33	0	0	-33	0.339	33
391	potA	Spermidine/putrescine import ATP-binding protein PotA OS=Escherichia coli (strain K12) GN=potA PE=1 SV=1	POTA_ECOLI	Cell inner membrane {ECO:0000255|HAMAP-Rule:MF_01726, ECO:0000269|PubMed:1939142, ECO:0000269|PubMed:7592703}; Peripheral membrane protein {ECO:0000255|HAMAP-Rule:MF_01726, ECO:0000269|PubMed:1939142, ECO:0000269|PubMed:7592703}.	33	0	0	-33	0.421	33
392	mdoB	Phosphoglycerol transferase I OS=Escherichia coli (strain K12) GN=mdoB PE=3 SV=2	OPGB_ECOLI	Cell inner membrane {ECO:0000269|PubMed:15919996}; Multi-pass membrane protein {ECO:0000269|PubMed:15919996}.	37	3	0.0810811	-34	0.316	37
393	ndh	NADH dehydrogenase OS=Escherichia coli (strain K12) GN=ndh PE=1 SV=2 1	DHNA_ECOLI	Cell membrane.	38	3	0.0789474	-35	0.544	38
394	murG	UDP-N-acetylglucosamine--N-acetylmuramyl-(pentapeptide) pyrophosphoryl-undecaprenol N-acetylglucosamine transferase OS=Escherichia coli (strain K12) GN=murG PE=1 SV=3	MURG_ECOLI	Cell inner membrane {ECO:0000255|HAMAP-Rule:MF_00033, ECO:0000269|PubMed:8449890}; Peripheral membrane protein {ECO:0000255|HAMAP-Rule:MF_00033, ECO:0000269|PubMed:8449890}.	36	1	0.0277778	-35	0.338	36
395	hemX	Putative uroporphyrinogen-III C-methyltransferase OS=Escherichia coli (strain K12) GN=hemX PE=1 SV=1	HEMX_ECOLI	Cell inner membrane {ECO:0000269|PubMed:16079137}; Single-pass membrane protein {ECO:0000269|PubMed:16079137}.	63	25	0.396825	-38	0.593	63
396	dacC	D-alanyl-D-alanine carboxypeptidase DacC OS=Escherichia coli (strain K12) GN=dacC PE=1 SV=2	DACC_ECOLI	Cell inner membrane {ECO:0000269|PubMed:3330754}; Peripheral membrane protein {ECO:0000269|PubMed:3330754}; Periplasmic side {ECO:0000269|PubMed:3330754}. Note=N-terminus lies in the periplasmic space, targeted there by the C-terminal amphiphilic helix (PMID:3330754).	49	9	0.183673	-40	0.482	49
397	glpC	Anaerobic glycerol-3-phosphate dehydrogenase subunit C OS=Escherichia coli (strain K12) GN=glpC PE=1 SV=1	GLPC_ECOLI	Cell inner membrane; Peripheral membrane protein. Note=Loosely bound to the cytoplasmic membrane often occurring in vesicles associated with fumarate reductase.	53	11	0.207547	-42	0.641	53
398	rbbA	Ribosome-associated ATPase OS=Escherichia coli (strain K12) GN=rbbA PE=1 SV=3	RBBA_ECOLI	Cell inner membrane {ECO:0000269|PubMed:21556145}; Multi-pass membrane protein {ECO:0000255}.	43	0	0	-43	0.358	43
399	ydgA	Protein YdgA OS=Escherichia coli (strain K12) GN=ydgA PE=1 SV=1	YDGA_ECOLI	Cell inner membrane {ECO:0000269|PubMed:16079137}; Peripheral membrane protein {ECO:0000269|PubMed:16079137}; Periplasmic side {ECO:0000269|PubMed:16079137}. Note=Has been isolated in association with the inner membrane, suggesting it may be tethered to the membrane.	57	13	0.22807	-44	0.687	57
400	rcsD	Phosphotransferase RcsD OS=Escherichia coli (strain K12) GN=rcsD PE=1 SV=3	RCSD_ECOLI	Cell inner membrane {ECO:0000305|PubMed:11309126}; Multi-pass membrane protein {ECO:0000305|PubMed:11309126}.	46	2	0.0434783	-44	0.345	46
401	ppiD	Peptidyl-prolyl cis-trans isomerase D OS=Escherichia coli (strain K12) GN=ppiD PE=1 SV=1	PPID_ECOLI	Cell inner membrane {ECO:0000269|PubMed:16079137}; Single-pass type II membrane protein {ECO:0000269|PubMed:16079137}; Periplasmic side {ECO:0000269|PubMed:16079137}.	89	44	0.494382	-45	0.668	89
402	atpG	ATP synthase gamma chain OS=Escherichia coli (strain K12) GN=atpG PE=1 SV=1	ATPG_ECOLI	Cell inner membrane {ECO:0000269|PubMed:16079137}; Peripheral membrane protein {ECO:0000269|PubMed:16079137}.	93	44	0.473118	-49	0.714	93
403	lldD	L-lactate dehydrogenase OS=Escherichia coli (strain K12) GN=lldD PE=1 SV=1	LLDD_ECOLI	Cell inner membrane {ECO:0000255|HAMAP-Rule:MF_01559, ECO:0000269|PubMed:18473}; Peripheral membrane protein {ECO:0000255|HAMAP-Rule:MF_01559, ECO:0000269|PubMed:18473}.	52	0	0	-52	0.53	52
404	oppF	Oligopeptide transport ATP-binding protein OppF OS=Escherichia coli (strain K12) GN=oppF PE=3 SV=1	OPPF_ECOLI	Cell inner membrane; Peripheral membrane protein.	56	0	0	-56	0.518	56
405	yfgM	UPF0070 protein YfgM OS=Escherichia coli (strain K12) GN=yfgM PE=3 SV=1	YFGM_ECOLI	Membrane {ECO:0000305}; Single-pass membrane protein {ECO:0000305}.	62	5	0.0806452	-57	0.709	62
406	dadA	D-amino acid dehydrogenase OS=Escherichia coli (strain K12) GN=dadA PE=1 SV=1	DADA_ECOLI	Cell inner membrane {ECO:0000269|PubMed:13292, ECO:0000269|PubMed:15358424}; Peripheral membrane protein {ECO:0000269|PubMed:13292, ECO:0000269|PubMed:15358424}.	64	2	0.03125	-62	0.475	64
407	dacA	D-alanyl-D-alanine carboxypeptidase DacA OS=Escherichia coli (strain K12) GN=dacA PE=1 SV=1	DACA_ECOLI	Cell inner membrane; Peripheral membrane protein; Cytoplasmic side. Note=N-terminal lies in the periplasmic space.	67	4	0.0597015	-63	0.519	67
408	tar	Methyl-accepting chemotaxis protein II OS=Escherichia coli (strain K12) GN=tar PE=1 SV=2 1	MCP2_ECOLI	Cell inner membrane {ECO:0000269|PubMed:22380631}; Multi-pass membrane protein {ECO:0000269|PubMed:22380631}. Note=Found predominantly at cell poles.	74	10	0.135135	-64	0.485	74
409	wbbK	Putative glycosyltransferase WbbK OS=Escherichia coli (strain K12) GN=wbbK PE=4 SV=1	WBBK_ECOLI	Cell inner membrane {ECO:0000305}; Peripheral membrane protein {ECO:0000305}.	68	4	0.0588235	-64	0.605	68
410	arcB	Aerobic respiration control sensor protein ArcB OS=Escherichia coli (strain K12) GN=arcB PE=1 SV=1	ARCB_ECOLI	Cell inner membrane {ECO:0000269|PubMed:15919996}; Multi-pass membrane protein {ECO:0000269|PubMed:15919996}.	64	0	0	-64	0.368	64
411	ftsH	ATP-dependent zinc metalloprotease FtsH OS=Escherichia coli (strain K12) GN=ftsH PE=1 SV=1	FTSH_ECOLI	Cell inner membrane {ECO:0000255|HAMAP-Rule:MF_01458, ECO:0000269|PubMed:15919996, ECO:0000269|PubMed:8444797, ECO:0000269|PubMed:8947034}; Multi-pass membrane protein {ECO:0000255|HAMAP-Rule:MF_01458, ECO:0000269|PubMed:15919996, ECO:0000269|PubMed:8444797, ECO:0000269|PubMed:8947034}.	232	165	0.711207	-67	0.665	232
412	tsr	Methyl-accepting chemotaxis protein I OS=Escherichia coli (strain K12) GN=tsr PE=1 SV=2 1	MCP1_ECOLI	Cell inner membrane {ECO:0000269|PubMed:15919996, ECO:0000269|PubMed:22380631}; Multi-pass membrane protein {ECO:0000269|PubMed:15919996, ECO:0000269|PubMed:22380631}. Note=Found predominantly at cell poles.	85	8	0.0941176	-77	0.53	85
413	plsB	Glycerol-3-phosphate acyltransferase OS=Escherichia coli (strain K12) GN=plsB PE=1 SV=2	PLSB_ECOLI	Cell inner membrane {ECO:0000269|PubMed:16294310, ECO:0000269|PubMed:4943977}; Peripheral membrane protein {ECO:0000269|PubMed:16294310, ECO:0000269|PubMed:4943977}; Cytoplasmic side {ECO:0000269|PubMed:16294310, ECO:0000269|PubMed:4943977}.	80	2	0.025	-78	0.465	80
414	atpF	ATP synthase subunit b OS=Escherichia coli (strain K12) GN=atpF PE=1 SV=1	ATPF_ECOLI	Cell inner membrane {ECO:0000255|HAMAP-Rule:MF_01398}; Single-pass membrane protein {ECO:0000255|HAMAP-Rule:MF_01398}.	205	117	0.570732	-88	0.692	205
415	dld	D-lactate dehydrogenase OS=Escherichia coli (strain K12) GN=dld PE=1 SV=3 1	DLD_ECOLI	Cell membrane; Peripheral membrane protein; Cytoplasmic side.	94	2	0.0212766	-92	0.606	94
416	atpH	ATP synthase subunit delta OS=Escherichia coli (strain K12) GN=atpH PE=1 SV=1	ATPD_ECOLI	Cell inner membrane {ECO:0000255|HAMAP-Rule:MF_01416, ECO:0000269|PubMed:16079137}; Peripheral membrane protein {ECO:0000255|HAMAP-Rule:MF_01416, ECO:0000269|PubMed:16079137}.	127	19	0.149606	-108	0.576	127
417	atpA	ATP synthase subunit alpha OS=Escherichia coli (strain K12) GN=atpA PE=1 SV=1	ATPA_ECOLI	Cell inner membrane {ECO:0000255|HAMAP-Rule:MF_01346, ECO:0000269|PubMed:16079137}; Peripheral membrane protein {ECO:0000255|HAMAP-Rule:MF_01346, ECO:0000269|PubMed:16079137}.	360	217	0.602778	-143	0.745	360
418	mgtA	Magnesium-transporting ATPase, P-type 1 OS=Escherichia coli (strain K12) GN=mgtA PE=1 SV=1	ATMA_ECOLI	Cell inner membrane {ECO:0000269|PubMed:15919996}; Multi-pass membrane protein {ECO:0000269|PubMed:15919996}.	218	46	0.211009	-172	0.408	218
419	sdhA	Succinate dehydrogenase flavoprotein subunit OS=Escherichia coli (strain K12) GN=sdhA PE=1 SV=1	SDHA_ECOLI	Cell inner membrane {ECO:0000269|PubMed:12560550, ECO:0000269|PubMed:16079137}; Peripheral membrane protein {ECO:0000269|PubMed:12560550, ECO:0000269|PubMed:16079137}; Cytoplasmic side {ECO:0000269|PubMed:12560550, ECO:0000269|PubMed:16079137}.	385	135	0.350649	-250	0.781	385
420	atpD	ATP synthase subunit beta OS=Escherichia coli (strain K12) GN=atpD PE=1 SV=2	ATPB_ECOLI	Cell inner membrane; Peripheral membrane protein.	623	252	0.404494	-371	0.898	623
